# Improved inference of population histories by integrating genomic and epigenomic data

Thibaut Sellinger<sup>1,2</sup>, Frank Johannes<sup>3</sup>, Aurélien Tellier<sup>2\*</sup>

<sup>1</sup> Department of Environment and Biodiversity,  
Paris Lodron University of Salzburg

<sup>2</sup> Professorship for Population Genetics,  
Department of Life Science Systems,  
Technical University of Munich

<sup>3</sup> Professorship for Plant Epigenomics,  
Department of Molecular Life Sciences,  
Technical University of Munich

\* Corresponding author, aurelien.tellier@tum.de

1

## Abstract

2

3

4

5

6

7

8

9

10

11

12

13

14

15

16

17

18

19

20

21

22

23

24

25

26

27

28

With the availability of high quality full genome polymorphism (SNPs) data, it becomes feasible to study the past demographic and selective history of populations in exquisite detail. However, such inferences still suffer from a lack of statistical resolution for recent, e.g. bottlenecks, events, and/or for populations with small nucleotide diversity. Additional heritable (epi)genetic markers, such as indels, transposable elements, microsatellites or cytosine methylation, may provide further, yet untapped, information on the recent past population history. We extend the Sequential Markovian Coalescent (SMC) framework to jointly use SNPs and other hyper-mutable markers. We are able to 1) improve the accuracy of demographic inference in recent times, 2) uncover past demographic events hidden to SNP-based inference methods, and 3) infer the hyper-mutable marker mutation rates under a finite site model. As a proof of principle, we focus on demographic inference in *A. thaliana* using DNA methylation diversity data from 10 European natural accessions. We demonstrate that segregating Single Methylated Polymorphisms (SMPs) satisfy the modelling assumptions of the SMC framework, while Differentially Methylated Regions (DMRs) are not suitable as their length exceeds that of the genomic distance between two recombination events. Combining SNPs and SMPs while accounting for site- and region-level epimutation processes, we provide new estimates of the glacial age bottleneck and post glacial population expansion of the European *A. thaliana* population. Our SMC framework readily accounts for a wide range of heritable genomic markers, thus paving the way for next generation inference of evolutionary history by combining information from several genetic and epigenetic markers.

29

30

**Keywords**— Kingman coalescent, Sequentially Markovian Coalescent, ancestral recombination graph, epigenetics, hidden markov model

## 31 Introduction

32 A central goal in population genetics is to reconstruct the evolutionary history  
33 of populations from patterns of genetic variation observed in the present. Rele-  
34 vant aspects of these histories include past demographic changes as well as sig-  
35 natures of selection. Inference methods based on Deep Learning (DL, [38]), Ap-  
36 proximate Bayesian Computation (ABC, [9]) or Sequential Markovian Coalescent  
37 (SMC, [40, 58]) aim to infer this information directly from full genome sequencing  
38 data, which is becoming rapidly available for many (non-model) species due to  
39 decreasing costs. The SMC, in particular, offers an elegant theoretical framework  
40 that builds on the classical Wright-Fisher and the backward-in-time Kingman coa-  
41 lescent stochastic models (*e.g.* [36, 13, 75]). Both models conceptualize Mendelian  
42 inheritance as generating the genealogy of a population (or a sample), that is, the  
43 unique history of a fragment of DNA passing from parents to offspring. When this  
44 genealogy includes the effect of recombination, it is called the Ancestral Recombi-  
45 nation Graph (ARG, [27, 79]).

46  
47 Under the Kingman coalescent model, the true genealogy of a population (or  
48 sample) is defined by its topology and branch length, and contains the information  
49 on past demographic changes and life history traits [50, 63, 68, 70] as well as selec-  
50 tive events [13, 75]. The genealogical and the mutational processes of any heritable  
51 marker can therefore be disentangled, and the frequency of any given marker state  
52 is given by the shape of the genealogy in time (see Figure 1A). A central assumption  
53 about heritable genomic markers is that they are generated by two homogeneous  
54 Poisson mutation processes along the genome as well as through time. This entails  
55 that mutations in different genealogies are independent due to the effect of recom-  
56 bination [79, 47], and that there are no time periods with a large excess, or a severe  
57 lack, of mutations along a genealogy (mutations are independently distributed in  
58 time within a DNA fragment). In other words, the frequency of polymorphisms  
59 at DNA markers observed across a sample of sequences are constrained by, as well  
60 as inform on, the underlying genealogy at this locus (Figure 1A). To clarify these  
61 assumptions, we present a schematic representation of a marker 1 (yellow in Figure  
62 1) which fulfills both homogeneous Poisson processes in time and along the genome.  
63 We also present cases applicable to a second genomic marker 2 that violates the  
64 model assumptions, namely by not being heritable (Figure 1B) or not following a  
65 non-homogeneous Poisson process in the genome (Figure 1C) or in time (Figure  
66 1D).

67

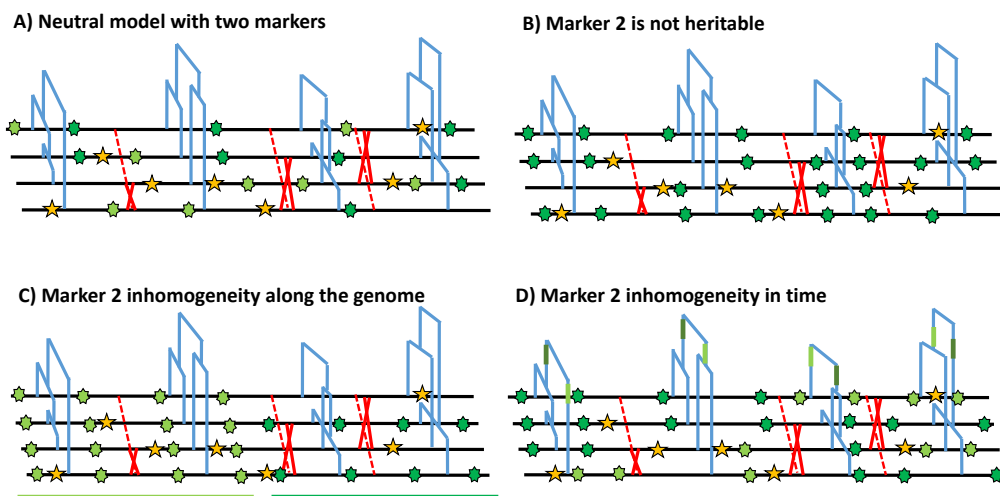

**Fig. 1. Schematic distribution of two markers along the genealogy and four genomes.** A) Schematic distribution of marker 1 (yellow star) and marker 2 (green star) along the genealogies in a sample of four genomes both following a homogeneous Poisson process. B) The green marker 2 is not heritable, so that its distribution is independent from the genealogy. C) The green marker 2 is spatially structured along the genome, violating the distribution of the Poisson process along the genome and conflicting with the genealogy. D) The green marker 2 does not follows Poisson process through time, *e.g.* burst of mutations at a specific time point represented by given branches of the genealogies in green. The yellow marker 1 has an identical Poisson process along the genome and the genealogy in all four panels, and for readability, marker 2 exhibits light and dark green states.

68 Despite the power of the SMC, well-known model violations such as variation  
69 in recombination and mutation rates along the genome [5, 4] or pervasive selection  
70 [61, 31, 30] can compromise the accuracy of demographic and selective inference  
71 [24, 64]. There are two other important issues that have received less attention in  
72 the literature. The first issue occurs when the population recombination rate ( $\rho$ )  
73 is higher than the population mutation rate ( $\theta$ ). In such cases, inferences can be  
74 biased if not erroneous [71, 64, 63], because several recombination events cannot  
75 be inferred due to the lack of Single Nucleotide Polymorphisms (SNPs for point  
76 mutations). This problem affects many species, though interestingly not humans  
77 which have a ratio  $\rho/\theta \approx 1$ . A second issue occurs when the mutational process  
78 along the genealogy is too slow be informative about sudden and strong variation  
79 in population size (*i.e.* population bottlenecks), such as during colonization events  
80 of novel habitats. The typical low mutation rate of  $10^{-9}$  up to  $10^{-8}$  (per base, per

81 generation) found in most species therefore places strong limitations on SMC anal-  
82 ysis of recent bottleneck events (up to ca.  $10^{-4}$  generations ago) when inference is  
83 based solely on SNP data. Indeed, bottlenecks are often either not found, or when  
84 inferred, their timing and magnitude are not well estimated (inferred smoother  
85 than in reality, [31, 64]), even when a large number of samples is used. A typical  
86 example is the large uncertainty of the timing and magnitude of the population  
87 size bottleneck during the Last Glacial Maximum (LGM) and post-LGM expan-  
88 sion in *A. thaliana* European populations based on several studies using different  
89 accessions and SMC inference methods [2, 19].

90  
91 Nonetheless, current SMC, DL or ABC inference methods making use of full  
92 genome sequence data rely almost exclusively on SNPs for inference [58, 71, 63,  
93 9, 37]. There are both practical and theoretical reasons for using SNPs: They are  
94 easily detectable from short-read re-sequencing data and their mutational process  
95 is well approximated by the infinite site model [13, 75], simplifying the inference of  
96 the underlying genealogy. However, other heritable genomic markers exists whose  
97 mutation rates can be several orders of magnitude higher than that of SNPs, and  
98 could thus be more informative about recent demographic events. These include  
99 microsatellites, insertions, deletions and transposable elements (TEs). Although  
100 those heritable markers are not necessarily neutral (such as TEs which are likely  
101 to be under weak purifying selection) they contain information on the evolutionary  
102 history of the population. Current technological limitations still impede the easy  
103 detection and estimation of allele frequencies for many of these markers [81, 53, 76].  
104 For example, identifying insertion/excision variation of transposable elements or  
105 copy number variation of microsatellites requires a high quality reference genome  
106 and ideally long-read sequencing approaches [53]. In addition to these genomic  
107 markers, DNA cytosine methylation is emerging as a potentially useful epigenetic  
108 marker for phylogenetic inference in plants [83, 84]. Stochastic gains and losses of  
109 DNA methylation at CG dinucleotides, in particular, arise at a rate of ca.  $10^{-4}$  up  
110 to  $10^{-5}$  per site per generation (that is 4 to 5 orders of magnitude faster than DNA  
111 point mutations, [73]), and can be inherited across generations [54, 78]. These  
112 so-called spontaneous epimutations are likely neutral at the genome-wide scale  
113 ([74, 29], but see [49, 54]), and can be easily detected from bisulphite converted  
114 short read sequencing data [41, 60]. Recent work suggests that CG methylation  
115 data can be used as a molecular clock for timing divergence between pairs of lin-  
116 eages over timescales ranging from years to decades [84].

117  
118 However, theoretical integration of the above-mentioned (epi)genomic markers  
119 into a population genomics and SMC inference framework is not trivial. Because of  
120 the high mutation rate, the mutational process at these (hyper-mutable) markers  
121 is reversible and more consistent with a finite site, rather than infinite site, model,  
122 which can result in extensive homoplasy (as known for microsatellite markers, [20]).  
123 Indeed, classic expectations of population genetics diversity statistics, mostly build

124 for SNPs, need to be revised for these hyper-mutable markers [14, 77]. Here we  
125 develop the theoretical and methodological inference framework named SMCtheo  
126 for the inclusion of additional (potentially hyper-mutable) markers into the SMC.  
127 We showcase our model using extensive simulations as well as application to pub-  
128 lished DNA cytosine methylation data (in genic regions) from local populations of  
129 *A. thaliana* [60, 74]. We demonstrate that integration of hyper-mutable genomic  
130 markers into SMC models significantly improves the inference accuracy of past  
131 variation of population size, or can even uncover demographic events not uncov-  
132 ered using SNPs alone. Our proof-of-principle approach opens up novel avenues  
133 for studying population genetic processes over time-scales that have been largely  
134 inaccessible using traditional SNP-based approaches. This may prove particularly  
135 useful when exploring recent demographic changes of endangered species as a way  
136 to assess their potential for extinction in the context of biodiversity loss and global  
137 change.

## 138 Results

### 139 Theoretical results with two markers underlying the SMC 140 computations

141 We study polymorphic sites across genomes of several sampled individuals which  
142 exhibit several possible markers (DNA nucleotides, methylation, TEs, indels, mi-  
143 crosatellites,...). We define any marker by 1) its maximum number of possible  
144 states ( $nb_s$ ), for example nucleotide sites have four states (A, T, C and G) while a  
145 methylation site has two states (methylated or unmethylated), and 2) its mutation  
146 rate  $\mu$ , *i.e.* the rate at which the state of a marker changes into another state per  
147 position and per generation [3] (for simplicity we assume an equal mutation rates  
148 between all bases, known as the Jukes-Cantor model). More specifically, we are  
149 interested in two rates: the DNA mutation rate for changes in DNA nucleotides,  
150 and epimutation rate for change in methylation state. Furthermore, we assume  
151 that at each position on the genome only one type of marker can occur and be  
152 observed. We obtain as a first theoretical result the probability for a given site in  
153 the genome to be identical ( $P(id)$ ) or segregating ( $P(seg)$ ) (*i.e.* polymorphic) in a  
154 sample of size two ( $n = 2$ , two sampled chromosomes are compared):

$$\begin{aligned} P(id, n = 2) &= \frac{1}{nb_s} + \frac{(nb_s - 1)}{nb_s} e^{-2\mu t_M \frac{(nb_s)}{(nb_s - 1)}} \\ P(seg, n = 2) &= \frac{(nb_s - 1)}{nb_s} - \frac{(nb_s - 1)}{nb_s} e^{-2\mu t_M \frac{(nb_s)}{(nb_s - 1)}} \end{aligned} \quad (1)$$

155 This probability is a function of the time to the most recent common ances-  
156 tor (TMRCA in text and  $t_M$  in equation 1, details in Supplementary Text). The  
157 probability for a mutation to occur for a given marker increases with an increased

158 TMRCA [13, 75], but under high mutation rates (and high effective population  
159 size) the marker may not be polymorphic in the sample as mutations may be re-  
160 versed (so-called homoplasy, [20, 14]). In Supplementary Figure S1 we illustrate  
161 these properties by computing the probability 1 for different mutation rates. The  
162 inference of recent demographic events and bottlenecks relies on the presence of  
163 polymorphic sites to detect recent coalescent events (TMRCA), and should be im-  
164 proved by using markers with high (or fast) mutation rate (*e.g.* hyper mutable).

165  
166 In the following, we simulate data under different demographic scenarios using  
167 the sequence simulator program *msprime* [6, 33], which generates the ARG of  $n$   
168 sampled diploid individuals (set to  $n = 5$  throughout this study, leading to 10  
169 haploid genomes). This ARG contains the genealogy of a given sample at each  
170 position of the simulated chromosomes. We then process the ARG to create DNA  
171 sequences according to the model parameters and the type of marker considered.  
172 We first assume a set of genomic markers obtained for a sample size  $n$ , and mu-  
173 tating according an homogeneous Poisson process along the genome and in time  
174 (along the genealogy) as in Figure 1A. To simulate the sequence data, we define  
175 the number of marker types (any number between 1 and the sequence length) and  
176 the proportion of sites of each marker type in the sequence. Each marker is char-  
177 acterized by both parameters  $nb_s$  and  $\mu$ . For simplicity, we simulate sequences  
178 with two markers, but note that the method can be easily extent to additional  
179 markers. Marker 1 represents 98% of the sequence, and has a per site mutation  
180 rate  $\mu_1 = 10^{-8}$  mimicking nucleotide SNP markers under an infinite site model  
181 (thus considered as bi-allelic at a given DNA site, [82]). By contrast, marker 2  
182 composes the complementary 2% of the sequence length, with a per site mutation  
183 rate of  $\mu_2 = 10^{-4}$  per generation between two possible states. Marker 2 is thus  
184 hyper-mutable compared to marker 1 and mimics methylation/epimutation sites.  
185 Note, that mutation events in Marker 1 and 2 are simulated under a finite site  
186 model.

187  
188 We use different SMC-based methods throughout this study. These methods  
189 include: 1) MSMC2 used as a reference method [45], 2) SMCtheo is an extension  
190 of the PSMC' [40, 58] accounting for any number of heritable theoretical mark-  
191 ers, and 3) eSMC2 which is equivalent to SMCtheo but accounting only for SNPs  
192 markers [64] (to avoid any bias in implementation differences between SMCtheo  
193 and MSMC2). All methods are Hidden Markov Models (HMM) derived from the  
194 Pairwise Sequentially Markovian Coalescent (PSMC') [58] and assume neutral evo-  
195 lution and a panmictic population. The hidden states of these methods are the  
196 coalescence time of a sample of size two at a position on the sequence. From the  
197 distribution of the hidden states along the genome, all methods can infer population  
198 size variation through time as well as the recombination rate [58, 45, 64].

199 **The inclusions of hyper-mutable genomic markers im-**  
200 **proves demographic inference**

201 We assume that the mutation rate of marker 1 is  $\mu_1 = 10^{-8}$  per generation per  
202 bp. We use this information to estimate the mutation rate of marker 2, which  
203 we vary from  $\mu_2 = 10^{-8}$  to  $\mu_2 = 10^{-2}$  per generation per bp. The estimation  
204 results based on simulated data under a constant population size of  $N = 10,000$   
205 are displayed in Table 1. We find that our approach is capable of inferring  $\mu_2$  with  
206 high accuracy for rates up to  $\mu_2 = 10^{-4}$ . However, when the mutation rate  $\mu_2$  is  
207  $10^{-2}$ , our approach underestimates it by a factor three, suggesting the existence of  
208 an accuracy limit. To demonstrate that information can be gained by integrating  
209 marker 2 (with  $\mu_2 = 10^{-4}$ ), we compared the ability of several inference methods to  
210 recover a recent bottleneck (Figure 2A). All methods correctly infer the amplitude  
211 of population size variation. When accounting only for marker 1 (with  $\mu_1 = 10^{-8}$ ,  
212 MSMC2 and eSMC2 fail to infer accurately the sudden variation of population size.  
213 However, with the inclusion of hyper-mutable marker 2, our SMCtheo approach  
214 correctly infers the rapid change of population size of the bottleneck (Figure 2A,  
215 green). It is encouraging that an accurate estimation of the demography is ob-  
216 tained, even when the mutation rate of marker 2 is unknown (Figure 2A, blue).

217

| True $\mu_2$ value | Estimated value of $\mu_2$   |
|--------------------|------------------------------|
| $10^{-8}$          | $9.9 \times 10^{-9}$ (0.02)  |
| $10^{-6}$          | $1.0 \times 10^{-6}$ (0.008) |
| $10^{-4}$          | $1.4 \times 10^{-4}$ (0.01)  |
| $10^{-2}$          | $3.05 \times 10^{-3}$ (0.41) |

Table 1: Average estimated values of the mutation rate of marker 2 ( $\mu_2$ ), knowing that of marker 1. We use 10 sequences (5 diploid individuals) of 100 Mb ( $r = \mu_1 = 10^{-8}$  per generation per bp) under a constant population size fixed at  $N = 10,000$ . The coefficient of variation over 10 repetitions is indicated in parentheses.

218 Furthermore, some species or populations might feature small effective popu-  
219 lation sizes (ca.  $N = 1,000$ ), potentially resulting in reduced genomic diversity.  
220 In such cases the inclusion of hyper-mutable markers should also improve demo-  
221 graphic inference. We present the results of such a scenario in Figure 2B, where  
222 the population size was divided by a factor 10 compared to the previous scenario in  
223 Figure 2A. We find that in the absence of the hyper-mutable marker 2, no approach  
224 can correctly infer the variation of population size. From the shape of the inferred  
225 demography, methods using only marker 1 do not suggest the existence of a bottle-  
226 neck followed by recovery (the "U-shaped" demographic scenario is not apparent  
227 with the orange and red lines, Figure 2 B). Yet, when integrating both markers,  
228 the population size can be recovered, even if the mutation rate of marker 2 is not  
229 *a priori* known. In both Figure 2A and B, we assume that the marker 2 occurs



230 at a frequency of 2% in the genome. This percentage may be unrealistically high  
231 depending on the marker and the species. To test the impact of reducing marker 2  
232 frequency, we repeat the simulations shown in Figure 2A, but set its frequency to as  
233 low as 0.1% (a 20-fold reduction). We find that the inclusion of the hyper-mutable  
234 marker 2 continues to improve inference accuracy in very recent times, albeit less  
235 pronounced than in Figure 2A (see Supplementary Figure 2). This suggests that a  
236 very small proportion of hyper-mutable genomic sites is sufficient to significantly  
237 improve the accuracy of inferences.

238

239 All full genome inference methods, especially SMC approaches, display lower  
240 accuracy when the population recombination rate ( $\rho = 4Nr$ ) is larger than the  
241 population mutation rate of marker 1 ( $\theta_1 = 4N\mu_1$ ). We simulate sequence data  
242 under a bottleneck scenario slightly more ancient than in Figure 2 A and assume  
243 that  $\rho/\theta_1 = r/\mu_1 = 10$  and  $\rho/\theta_2 = r/\mu_2 = 10^{-3}$ . Our results show that by inte-  
244 grating the genomic marker 2 which mutation rate is larger than the recombination  
245 rate, estimates of the recombination rate as well as past population size variation  
246 are substantially improved (Table 2, Figure 2C). Indeed, analyzing only marker 1,  
247 eSMC2 and MSMC2 identify the bottleneck (albeit smoothed) and only slightly  
248 overestimate recent population size (Figure 2D). By integrating the hyper-mutable  
249 marker 2, our SMCtheo approach correctly infers the strength and time of the  
250 bottleneck when  $\mu_1$  and  $\mu_2$  are known (Figure 2D, green line), while the timing of  
251 the bottleneck is slightly shifted in the past when  $\mu_2$  is unknown and estimated by  
252 our method (Figure 2D, blue line). When  $\mu_2$  is unknown, SMCtheo additionally  
253 infers a spurious sudden variation of population size between 10,000 and 100,000  
254 generations ago. Using only marker 1, the estimates of the recombination rate are  
255 inaccurate (Table 2). To complete the visual representation and provide a quan-  
256 titative assessment of inference accuracy, we compute the root mean square error  
257 (RMSE) values for demographic inference (Supplementary Table 1). We further im-  
258 prove the accuracy of estimation by optimizing the likelihood (LH) to estimate the  
259 recombination rate and demography compared to the classically used Baum-Welch  
260 (BW) algorithm (Table 2 and Supplementary Figure S3). Our results demonstrate  
261 that SNPs are limiting and insufficient for accurate inferences in recent times and  
262 that the inclusion of an additional marker with mutation rate higher than the  
263 recombination rate generates significant improvements in demographic inference.  
264 However, by directly optimizing the likelihood the true recombination rate can be  
265 well recovered even with marker 1 only.

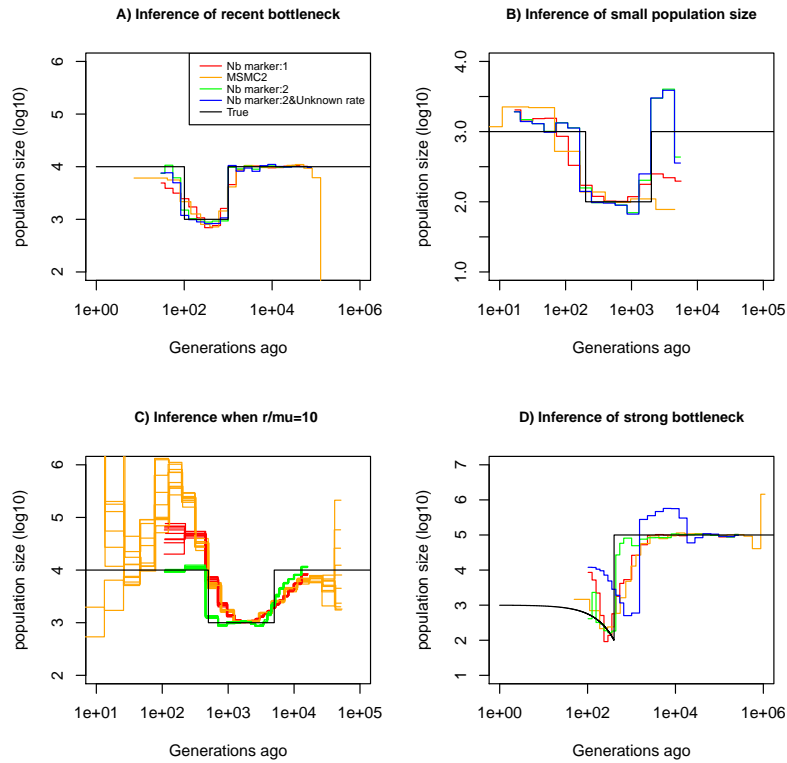

**Fig. 2. Performance of SMC approaches using different markers.** Estimated demographic history of a bottleneck (black line) by SMC approaches using two genomic markers. In orange and red, are the estimates by MSMC2 and eSMC2 based on only marker 1. Estimates from SMCtheo integrating both markers are in green (with known  $\mu_2$ ), and in blue with unknown  $\mu_2$ . The demographic scenarios are A) 10-fold recent bottleneck with an ancestral population size  $N = 10,000$ , B) 10-fold recent bottleneck with an ancestral population size  $N = 1,000$ , C) 10-fold bottleneck with an ancestral population size  $N = 10,000$ , and D) a very severe (1,000 fold) and very recent bottleneck with incomplete size recovery. In A, B and D, we assume  $r/\mu_1 = 1$  (with  $r = \mu_1 = 10^{-8}$ ,  $\mu_2 = 10^{-4}$  per generation per bp) and in C,  $r/\mu_1 = 10$  (with  $r = 10^{-7}$ ,  $\mu_1 = 10^{-8}$ , and  $\mu_2 = 10^{-4}$  per generation per bp). In all cases (A, B, C and D) 10 sequences (5 diploid individuals) of 100 Mb were used as input.

| Method        | True recombination rate | Average estimated recombination rate |
|---------------|-------------------------|--------------------------------------|
| MSMC2 (BW)    | $10^{-7}$               | $0.23 \times 10^{-7}$ (0.017)        |
| 1 Marker : BW | $10^{-7}$               | $0.25 \times 10^{-7}$ (0.012)        |
| 2 Marker : BW | $10^{-7}$               | $0.90 \times 10^{-7}$ (0.004)        |
| 1 Marker : LH | $10^{-7}$               | $0.84 \times 10^{-7}$ (0.036)        |
| 2 Marker : LH | $10^{-7}$               | $0.94 \times 10^{-7}$ (0.01)         |

Table 2: Estimates of recombination rates with one or both markers. For SMCtheo, BW stands for the use of the Baum-Welch algorithm to infer parameters, and LH to the use of the likelihood. We use 10 sequences of 100 Mb with  $r = 10^{-7}$ ,  $\mu_1 = 10^{-8}$  and  $\mu_2 = 10^{-4}$  per generation per bp in a population with a past bottleneck event. The coefficient of variation over 10 repetitions is indicated in brackets.

## 266 Integrating DNA methylation improves the accuracy of 267 inference

### 268 Definition of the theoretical model for DNA methylation

269 Following the previously encouraging results of demographic inference with SNPs  
270 and an hyper-mutable marker under the specific assumptions of Figure 1A, we  
271 develop a specific SMCm method to jointly analyse SNPs and CG methylation  
272 as an epigenetic hyper-mutable marker. Since our SMCm stems from the eSMC  
273 [63, 68] it corrects for the effect of self-fertilization when applying to *A. thaliana*.  
274 We focus here on methylation located in CG contexts within genic regions as these  
275 have been found to evolve neutrally [74, 83, 84]. The methylation of individual  
276 CG dinucleotides produces a biallelic heritable marker with a finite number of  
277 (epi)mutable sites (Figure 3). In a sample of several sequences from a population,  
278 variation in the methylation status of individual CGs is known as single methyla-  
279 tion polymorphism (SMP, Figure 3A) which could be used for demographic and  
280 divergence inference [73, 74]. However, CG methylation sites can also be orga-  
281 nized in spatial clusters (of similar state) due to region level epimutation (Figure  
282 3B, [78, 18, 49]). Region level epimutations can have different epimutation rates  
283 than individual CG sites. Population-level variation in the methylation status of  
284 these clusters is known as differentially methylated regions (DMRs). Furthermore,  
285 when integrating SMP and DMR epimutational processes (*i.e.* what we here call  
286 region level epimutation), the methylation status of CG sites is therefore affected  
287 by the superposition of both processes. Therefore the simulation and modeling  
288 of epimutational processes of SMPs is more complex than in our previous model  
289 as we need to account for the effect of region methylation as well as for methyla-  
290 tion and demethylation epimutation rates to be different and asymmetrical [73, 18].

291

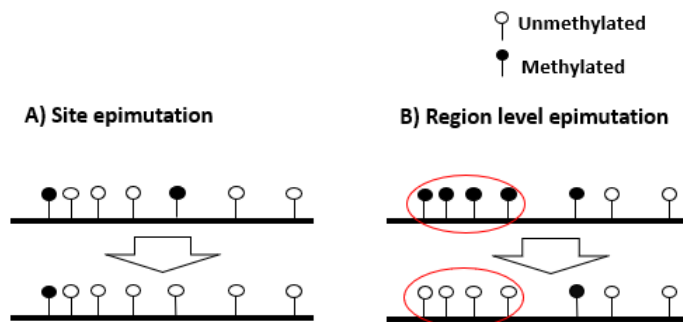

**Fig. 3. Schematic representation of site and region epimutations**

Schematic representation of a sequence undergoing epimutation at A) the cytosine site level, and B) at the region level. A methylated cytosine in CG context is indicated in black and an unmethylated cytosine in white.

292 To make our simulations realistic, we use the *A. thaliana* genome sequence as  
293 a starting point, and focus on CG dinucleotides within genic regions. To that end,  
294 we selected random 1kb regions within genes and choose only those CG sites that  
295 are clearly methylated or unmethylated in *A. thaliana* natural populations based  
296 on whole genome bisulphite sequencing (WGBS) measurements from the 1001G  
297 project (SI text). Our simulator for CG methylation is built in a similar way as  
298 the one described above but the epimutation rates are allowed to be asymmetric  
299 with the per-site methylation rate ( $\mu_{SM}$ ) and demethylation ( $\mu_{SU}$ ). Region-level  
300 epimutations are also implemented, setting the region length to either 1kb [49] or  
301 150 bp [18]. The region level methylation and demethylation rates are defined as  
302  $\mu_{RM}$  and  $\mu_{RU}$ , respectively. We assume that site-level and region-level epimuta-  
303 tion processes are independent. Making this assumption explicit later allow us to  
304 test if it is violated in comparisons with actual data. Our simulator also assumes  
305 that DNA mutations and epimutations are independent of one another. That is,  
306 for simplicity we ignore the fact that methylated cytosines are more likely to tran-  
307 sition to thyamines as a result of spontaneous deamination [28]. We also ignore  
308 the possibility that new DNA mutations could act as CG methylation quantitative  
309 trait loci and affect CG methylation patterns in both cis and trans. Such events  
310 are extremely rare so that the above assumptions should hold reasonably well over  
311 short evolutionary time-scales. As the goal is to apply our approach to *A. thaliana*,  
312 we simulate sequence data for a sample size  $n = 10$  (but considering *A. thaliana*  
313 haploid) from a population displaying 90% selfing [63?] under a recent severe  
314 population bottleneck demographic scenario. We simulate data assuming previ-  
315 ously estimates of the rates of recombination [56], DNA mutation [52], and site-  
316 and region-level methylation [73, 18].

317

318 As guidance for future analyses of demographic inference using SNPs and DNA  
319 methylation data, the theoretical and empirical analysis of *A. thaliana* methylomes

320 consist of the following five steps: 1) assessing the relevance of region-level methy-  
321 lation (DMRs) for inference, 2) inference of site and region epimutation rates, 3)  
322 comparing statistics for the SNPs, SMPs and DMRs distributions, 4) demographic  
323 inference using SNPs with SMPs or DMRS, and 5) demographic inference using  
324 SNPs with SMPs and DMRs.

325

### 326 **Step 1: assessing the relevance of region-level methylation (DMRs)** 327 **for inference**

328 We determine our ability to detect the existence of spatial correlations between  
329 epimutations. That is, we asked if site-specific epimutations can lead to region-  
330 level methylation status changes across a range of epimutation rates (assuming  
331 two sequences of 100 Mb,  $r = \mu_1 = 10^{-8}$  per generation per bp and a constant  
332 population size  $N = 10,000$ , results in Supplementary Table 2). If site-specific  
333 epimutations are independently distributed, the probability of a given site to be in  
334 a given (methylated or unmethylated) state should be independent from the state of  
335 nearby sites (knowing the epimutation rate per site). Conversely, if there is a region  
336 effect on epimutation (DMRs), two consecutive sites along the genome would ex-  
337 hibit a positive correlation in their methylated states. We therefore calculate from  
338 the per-site (de)methylation rates  $\mu_{SM}$  and  $\mu_{SD}$  the probability that two successive  
339 cytosine positions are identical in their methylation assuming they are independent.  
340 This probability can be compared to the one observed from methylation data (here  
341 simulated) so that we obtain a statistical test for the existence of a positive cor-  
342 relation in the methylation status of nearby sites, interpreted as a regional-level  
343 epimutation process (p-value = 0.05) according to Figure 1A. A small p-value of the  
344 test ( $<0.05$ ) suggests the existence of a region effect for methylation/demethylation  
345 affecting neighbouring cytosines, contrary to a high p-value indicating no spatial  
346 structure of methylation distribution. We find that when region epimutation rates  
347 are higher than (or similar to) site-level epimutation rates, namely  $\mu_{RM} \gtrsim \mu_{SM}$   
348 and  $\mu_{RU} \gtrsim \mu_{SU}$ , the existence of regions of consecutive cytosines is detected with  
349 high accuracy. However, when site-level epimutation rates are higher ( $\mu_{SU} > \mu_{RU}$   
350 and  $\mu_{SM} > \mu_{RM}$ ) than region-level epimutation rates, region-level changes cannot  
351 be readily detected (Supplementary Table 2). When methylated regions are de-  
352 tected, we can further determine their length using a specifically developed Hidden  
353 Markov Model (HMM) using all pairs of genomes (similarly to [65, 18, 69]). While  
354 the length of the methylated region is pre-determined in our simulations (1kb or  
355 150bp), site-level epimutation occur which can change the distribution of methy-  
356 lation states in that region and across individuals, thus DMR regions can vary in  
357 length along the genome and between pairs of chromosomes.

358

## 359 **Step 2: inference of site- and region-level epimutation rates**

360 As the epimutation rates of most plant species remain unknown, we assess the  
361 accuracy of SMCm to infer epimutation rates at the site- and region-level directly  
362 from simulated data. We first assume that either only site- or only region epimu-  
363 tations can occur, and infer their respective rates (see Supplementary Table 3 and  
364 4). Our SMCm approach can accurately recover these rates except when these  
365 are higher than  $10^{-4}$ . Next, we assess the accuracy of our approach to simultane-  
366 ously infer site- and region-level epimutation rates assuming that region and site  
367 epimutation rates are equal (Supplementary Table 5 and Supplementary Figure 4).  
368 Similar to our previous observation, we find that when the epimutation rates are  
369 very high (*e.g.* close to  $10^{-2}$ ), accuracy is lost compared to slower epimutation  
370 rates. Nonetheless, our average estimated rates are off from the true value by less  
371 than an factor 10. Hence, under our model assumptions, we are able to recover the  
372 correct order of magnitude for site- and region-level methylation and demethyla-  
373 tion rates.

374

## 375 **Step 3: distribution of statistics for SNPs, SMPs and DMRs**

376 To gain insights on the distribution of epimutations under the described assump-  
377 tions, we look at key statistics from our simulations: the distribution of distance  
378 between two recombination events versus the distribution of the length of estimated  
379 DMR regions (Figure 4A), and the LD decay for SMPs (in genic regions) and SNPs  
380 (in all contexts) (Figure 4C, D). In our simulations DMRs regions have a maximum  
381 fixed size, but their length depends on the interaction between the region- and site-  
382 level epimutation rates. As mentioned in step 1, the methylated/demethylated re-  
383 gions are detected using the binomial test and their length estimated by the HMM.  
384 Therefore, while variation exists for the length of these regions (Figure 4A), regions  
385 are on average shorter than the span of genealogies along the genome, which are  
386 defined by the frequency of recombination events along the genome ( $r = 3.5 \times 10^{-8}$   
387 as in *A. thaliana*). There is virtually no linkage disequilibrium (LD) between  
388 epimutations due to the high epimutation rate (Figure 4C), while the LD between  
389 SNPs can range over few kbp (Figure 4D, as observed in *A. thaliana* [12, 60]).  
390 Note however, that the region methylation process in itself does not generate LD  
391 because this measure can only be computed if SMPs are present in frequency  
392 higher than  $2/n$  in the sample, *i.e.* there is no LD measure defined for monomor-  
393 phic methylated/unmethylated regions. In other words, our simulator generates  
394 SNPs, SMPs and DMRs which fulfill the three key assumptions of Figure 1A. We  
395 note that by using a constant population size  $N = 10,000$ , the LD decay for SNPs  
396 is higher than in the *A. thaliana* data which exhibit an effective population size of  
397 ca.  $N = 250,000$  [12] and past changes in size.

398

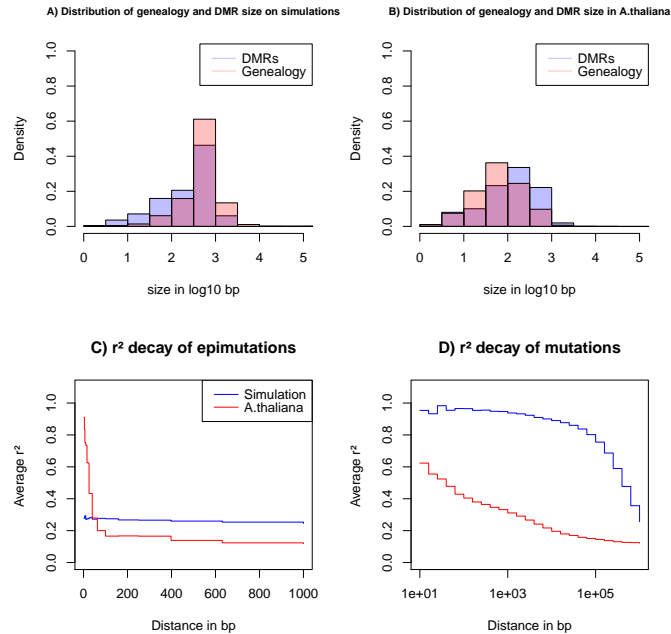

**Fig. 4. Key statistics for epimutations and mutations.** A) Histogram of the length between two recombination events (genomic span of a genealogy) and DMRs size in bp of the simulated data. B) Histogram of genealogy span and DMRs size in bp from the *A. thaliana* data (10 German accessions). C) Linkage disequilibrium decay of epimutations in our samples of *A. thaliana* (red) and simulated data (blue). D) Linkage disequilibrium decay of mutations in our *A. thaliana* samples (red) and simulated data (blue). The simulations reproduce the outcome of a recent bottleneck with sample size  $n = 5$  diploid of 100 Mb, the rates per generation per bp are  $r = 3.5 \times 10^{-8}$ ,  $\mu_1 = 7 \times 10^{-9}$ ,  $\mu_{SM} = 3.5 \times 10^{-4}$ ,  $\mu_{SU} = 1.5 \times 10^{-3}$ , and per 1kb region  $\mu_{RM} = 2 \times 10^{-4}$  and  $\mu_{RU} = 1 \times 10^{-3}$ .

#### 399 Step 4: demographic inference based on SNPs with SMPs or DMRs

400 We test the usefulness of either SMPs or DMRs for demographic inference. Simulations  
 401 under the demographic model from steps 1-3 assume DNA mutations (SNPs)  
 402 and only site epimutations (SMPs), *i.e.* no region-level methylation ( $\mu_{RM} = \mu_{RU} =$   
 403 0). We perform inference of past demographic history under different amount of  
 404 potentially methylated sites with and without *a priori* knowledge of the methy-  
 405 lation/demythylation rates (Figure 5A, B). When the site epimutation rates are  
 406 *a priori* known, the sharp decrease of population size can be accurately detected.  
 407 When epimutation rates are unknown, the shape of the past demographic history is  
 408 also well inferred except for a scaling issue (a shift along the x- and y-axes similar to  
 409 that in Figure 5D). When we vary the amount of potentially methylated sites (2%,  
 410 10% and 20%) our inference results remain largely unchanged. This suggests that

411 having methylation measurements for as low as 2% of all CG sites being epimutable  
412 in the genome is entirely sufficient to improved SNP-based demographic inference  
413 (eSMC2 in Figure 5A). The RMSE values for demographic inference are computed  
414 for all cases in Figure 5 to provide an additional quantitative understanding of our  
415 results (Supplementary Table 6).

416

417 The amount of sequence data used in Figure 5A and B is fairly large com-  
418 pared to real datasets (10 haploid genomes of length 100 Mb). We therefore ran  
419 the SMCm and eSMC2 on sequence data simulated under the same scenario but  
420 with a reduced sequence length of 10 Mb ( $n = 5$  diploid, Figure 5C and D, only  
421 3 repetitions are presented for visibility). In this case, we found that inference  
422 is significantly affected when using only SNPs (eSMC2 in blue), as we are un-  
423 able to correctly recover the demographic scenario. However, incorporating SMPs  
424 with known site-level epimutations into the model leads to substantial inference  
425 improvements (Figure 5C and D, Supplementary Table 6).

426

427 We additionally quantify the accuracy gain in ARG inference by inferring the  
428 expected coalescent time (TMRCA) at each position in the genome by the three ap-  
429 proaches (eSMC2, SMCm with unknown epimutation rates and SMCm with known  
430 epimutation rates) under the same scenario from Figure 5. The RMSE values of  
431 the TMRCA inference are presented in Supplementary Table 7. We confirm our  
432 intuition that integrating epimutations slightly improves the accuracy of TMRCA  
433 when the epimutation rates are known, but does not when the rates are unknown.

434

435 To quantify the effect of DMRs on inference, we simulate data under the  
436 same demographic scenario, but assume only region level epimutations (DMRs,  
437  $\mu_{SM} = \mu_{SU} = 0$ ). The results for DMR region sizes 1kb and 150bp are displayed  
438 in Supplementary Figure S5 and S6, respectively. As in Figure 5, we observed a gain  
439 of accuracy in inference when region-level epimutation rates are known, while the  
440 length of the region (1kb or 150bp) does not seem to affect the result. However,  
441 no significant gain of information is observed when integrating DMR data with  
442 unknown epimutation rates (Supplementary Figure 5 and 6). In summary, CG  
443 methylation SMPs and to a lesser extend DMRs, can be used jointly with SNPs to  
444 improve demographic inference (Supplementary Table 8 presents the corresponding  
445 RMSE values for demographic inference shown in Supplementary Figure 5 and 6),  
446 especially in recent times (Supplementary Table 6 and 8).

447



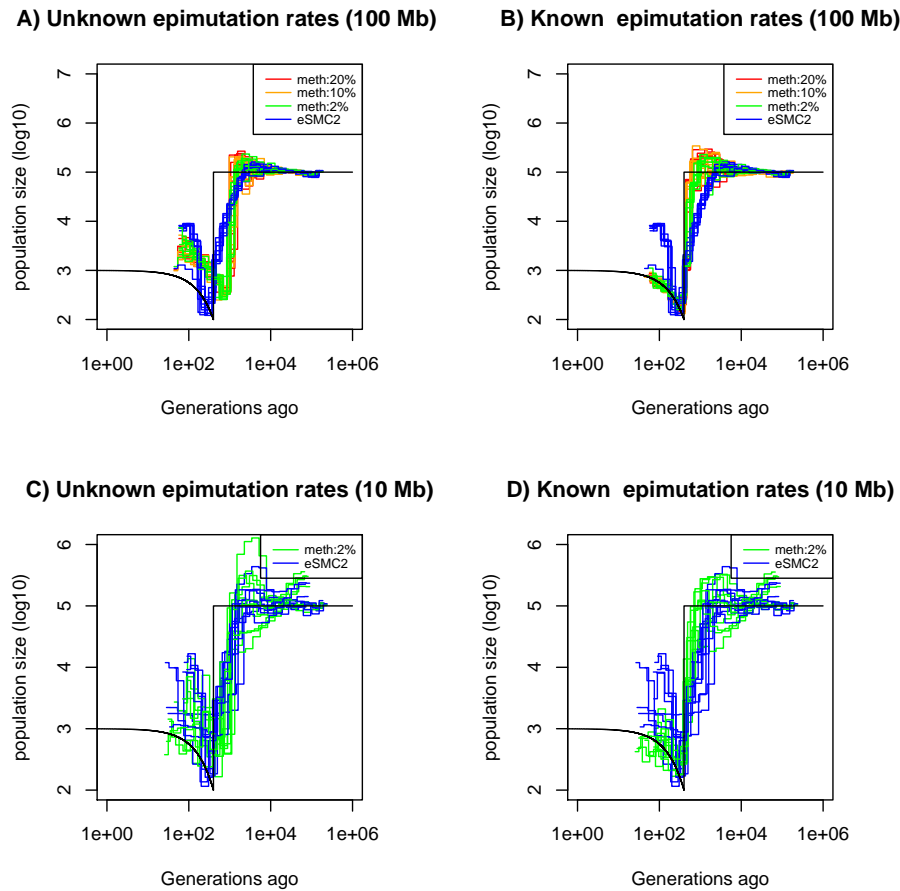

**Fig. 5. Performance of SMC approaches using site epimutations (SMPs) and mutations (SNPs) under a bottleneck scenario.** Estimated demographic history by eSMC2 (blue) and SMCm assuming the epimutation rate is known (B and D) or not (A and C) where the percentage of CG sites with methylated information varies between 20% (red), 10% (orange) and 2% (green) using 10 sequences of 100 Mb in A and B (with 10 repetitions) and 10 sequences of 10 Mb in C and D (three repetitions displayed) under a recent severe bottleneck (black). The parameters are:  $r = 3.5 \times 10^{-8}$  per generation per bp, mutation rate  $\mu_1 = 7 \times 10^{-9}$ , methylation rate to  $\mu_{SM} = 3.5 \times 10^{-4}$  and demethylation rate to  $\mu_{SU} = 1.5 \times 10^{-3}$  per generation per bp.

448 **Step 5: demographic inference based on SNPs with SMPs and**  
 449 **DMRs**

450 Since site- and region-level methylation processes can occur in real data, we run  
 451 SMCm on simulated data under the same demographic scenario, but now using  
 452 both site (SMPs) and region (DMRs) epimutations and accounting for both mu-

453 tation processes (with rates similar to the one found in *Arabidopsis thaliana*).  
454 Inference results are displayed in Supplementary Figure 7 (RMSE values in Sup-  
455 plementary Table 9). When the epimutation rates are unknown, we observe a gain  
456 of accuracy when integrating epimutations, especially in the recent times. However  
457 when epimutation rates are *a priori* known we observe a loss of accuracy when ac-  
458 counting for epimutations. This loss of accuracy is due to the mislabeling of the  
459 methylation region status (in step 1) when site and region-level epimutations occur  
460 jointly at similar rates (as there will be methylated sites in unmethylated regions  
461 and unmethylated sites in methylated regions).

462

463 Finally, we assess the inference accuracy when using SNPs and SMPs but ignor-  
464 ing in SMCm the region methylation effect (DMRs), even though this latter process  
465 takes place (Supplementary Figure 8, RMSE values in Supplementary Table 10).  
466 The inference accuracy decreases compared to the previous results (Supplementary  
467 Figure 5-7), and while the sudden variation of population is somehow recovered,  
468 the estimates of the time and magnitude of size change are not well recovered in  
469 recent time. Hence those results demonstrate the importance of accounting for site  
470 and region level epimutations processes in steps 1 to 5.

471

472 We demonstrate that our SMCm can exhibit, to some extent, an improved sta-  
473 tistical power for demographic inference using SNPs and SMPs while accounting  
474 for site and region-level methylation processes under the assumptions of Figure 1A.  
475 We show that 1) using SMPs we can unveil past demographic events hidden by  
476 limitations in SNPs, 2) the correct demography can be uncovered irrespective of  
477 knowing *a priori* the epimutation rates, 3) ignoring site or region-level processes  
478 can decrease the accuracy of inference, and 4) knowing the epimutation rates may  
479 improve the estimate of demography compared to simultaneously estimating them  
480 with SMCm.

481

## 482 **Joint use of SNPs and SMPs improves the inference of** 483 **recent demographic history in *A. thaliana***

### 484 **Step 1: assessing the strength of region-level methylation process** 485 **in *A. thaliana***

486 We apply our inference model to genome and methylome data from 10 *A. thaliana*  
487 plants from a German local population [12]. We start by assessing the strength of  
488 a region effect on the distribution of methylated CG sites along the genome. As  
489 expected from [18], for all 10 individual full methylomes we reject the hypothesis of  
490 a binomial distribution of methylated and unmethylated sites along the genomes,  
491 suggesting the existence of region effect methylation (yielding DMRs) meaning  
492 that CG are more likely to be methylated if in a highly methylated region, and

493 conversely for unmethylated CG. This is consistent with the autocorrelations in  
494 mCG found in [18, 11, 43]. As a first measure of methylated region length, we test  
495 the independence between two annotated CG methylation given a minimum ge-  
496 nomic distance between them (within one genome). We observe an average p-value  
497 smaller than 0.05 for distances up to 2,000bp but then the p-value rapidly increases  
498 ( $>0.4$ ) (Supplementary Figure 9). As a second measure, our HMM (based on pairs  
499 of genomes) yields a DMR average length of 222 bp (distribution in Figure 4B).

500

501 We conclude that the minimum distance for epimutations to be independent  
502 along a genome is over 2kb and spans larger distance than the typically proposed  
503 DMR size (ca. 150 bp in [18] and 222bp in our analysis) and can therefore cover the  
504 size of a gene (see [49, 11]). The simulations and data from *A. thaliana* indicate that  
505 the epimutation processes that produces DMRs at the population level in plants  
506 cannot simply results from the cumulative action of single-site epimutations. This  
507 insights is consistent with recent analyses of epimutational processes in gene bodies,  
508 which seems to indicate that the autocorrelation in CG methylation is a function of  
509 cooperative methylation maintenance and the distribution of histone modifications  
510 [11, 43].

## 511 **Step 2: site- and region-level epimutation rates**

512 We use the rates empirically estimated in *A thaliana* and taken in the above sim-  
513 ulations ( $\mu_{SM} = 3.5 \times 10^{-4}$  and  $\mu_{SU} = 1.5 \times 10^{-3}$  per bp per generation and  
514  $\mu_{RM} = 2 \times 10^{-4}$  and  $\mu_{RU} = 1 \times 10^{-3}$  per region per generation, [73, 18]).

515

## 516 **Step 3: distribution statistics for SNPs, SMPs and DMRs in *A.*** 517 *thaliana*

518 Since our SMC model assumes that DNA, SMP and DMR polymorphisms are de-  
519 termined by the underlying population/sample genealogy, DMR which span long  
520 genomic regions may spread across multiple genealogies and thus violates our mod-  
521 elling assumptions. We thus further investigate the potential discrepancies between  
522 the data and our model (Figure 4). We infer the DMR sizes from all 10 *A. thaliana*  
523 accessions using our *ad hoc* HMM, and measure the bp distance between a change  
524 in the expected hidden state (*i.e.* coalescent time) along the genome, which we  
525 interpret as recombination events (called the genomic span of a genealogy). The  
526 resulting distributions are found in Figure 4B. We observe that both distributions  
527 have a similar shape but DMRs are on average twice as large as the inferred ge-  
528 nomic genealogy span: average length of 222 bp (DMR) vs 137 bp (genealogy) and  
529 median length of 134 bp (DMR) vs 62 bp (genealogy). This means that on average  
530 DMRs are larger than the average distance between two recombination events, thus  
531 violating the homogeneous distribution of epimutations along the genome (Figure

532 1C).

533

534 To further unveil potential non-homogeneity of the distribution of epimuta-  
535 tions, we assess the decay of LD of mutations (SNPs) and epimutations (SMPs)  
536 (Figure 4C and D) confirming the results in [60]. We find the LD between SMPs in  
537 the data to be high (and higher than LD between SNPs) for distance smaller than  
538 100 bp (red line in Figure 4C and D). The LD decay of SMPs is much faster than  
539 for SNPs (no linkage disequilibrium between epimutations for distances  $> 100$ bp),  
540 likely stemming from 1) epimutation rates being much higher than the DNA mu-  
541 tation rate, and 2) the high per site recombination rate in *A. thaliana*. Moreover,  
542 the LD between SMPs at distance smaller than 100bp in *A. thaliana* being much  
543 higher compared to our simulations (Figure 4C), we suggest that additional local  
544 mechanisms of epimutation processes may not be accounted for in our model of  
545 the region-level methylation process.

546

#### 547 **Step 4: demographic inference for *A. thaliana* based only on SNPs** 548 **and SMPs**

549 Finally, we apply the SMCm approach to data from the German accessions of *A.*  
550 *thaliana*. When using SNP data only, the demographic results are similar to those  
551 previously found [63, 68] (Figure 6 purple lines), with no strong evidence for an  
552 expansion post-Last Glacial Maximum (LGM) [12]. We then sub-sample and ana-  
553 lyze segregating SMPs, which exhibit both methylated and unmethylated states in  
554 our sample (as in [73]). Here we ignore DMRs and account only for SMPs. When  
555 we use as input the methylation and demethylation rates that have been inferred  
556 experimentally [73], a mild bottleneck post-LGM is followed by recent expansion  
557 (Figure 6 blue lines). By contrast, letting our SMCm estimate the epimutations  
558 rates, we find in recent times a somehow similar but stronger demographic change  
559 post-LGM. We find a strong bottleneck event occurring between ca. 5,000 and  
560 10,000 generations ago followed by an expansion until today (Figure 6 green lines).  
561 The inferred site epimutation rates are 10,000 faster than the DNA mutation rate  
562 (Supplementary Table 11) which is close to the expected order of magnitude from  
563 experimental measures with and without DMR effects [73, 18]. Both estimates  
564 thus yield a post-LGM bottleneck followed by a recent population expansion.

565

566 These results indicate that the inclusion of DNA methylation data can aid in  
567 the accurate reconstruction of the evolutionary history of populations, particularly  
568 in the recent past where SNPs reach their resolution limit. This is made possible by  
569 the fact that the DNA methylation status at CG dinucleotide undergoes stochastic  
570 changes at rates that are several orders of magnitude higher than the DNA muta-  
571 tion rate, and can be inherited across generations similar to DNA mutations.

572

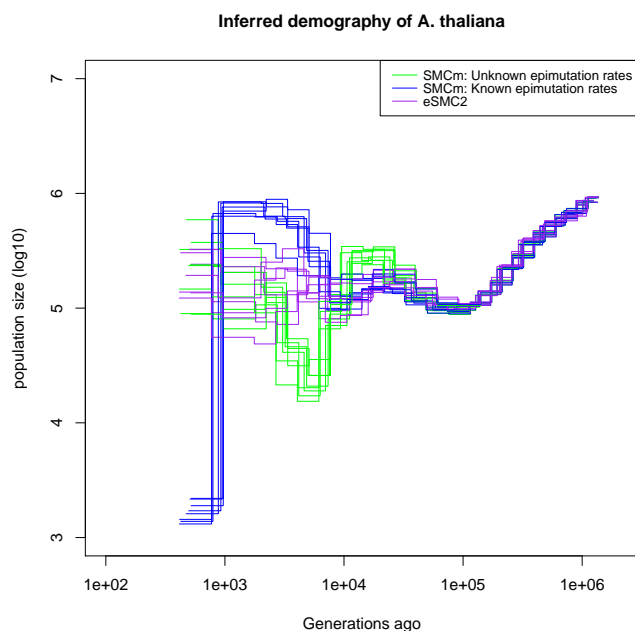

**Fig. 6. Integrating epimutations and mutations on German accessions of *A. thaliana*.** Estimated demographic history of the German population by eSMC2 (only SNPs, purple) and SMCm when keeping polymorphic methylation sites (SMPs) only: green with epimutation rates estimated by SMCm, blue with epimutation rates fixed to empirical values. The region epimutation effect is ignored. The parameters are  $r = 3.6 \times 10^{-8}$ ,  $\mu_1 = 6.95 \times 10^{-9}$ , and when assumed known, the site methylation rate is  $\mu_{SM} = 3.5 \times 10^{-4}$  and demethylation rate is  $\mu_{SU} = 1.5 \times 10^{-3}$ .

### 573 **Step 5: demographic inference correcting for DMRs in *A. thaliana***

574 To assess the robustness of our inference results, we run SMCm using all cytosines  
575 (CG) sites with an annotated methylation status (segregating or not) while ac-  
576 counting or not for DMRs (Supplementary Figure 10). We fix epimutation rates to  
577 the empirically estimated values, and confirm the estimates from Figure 6. When  
578 the region-level methylation process is ignored the inferred demography (blue lines  
579 in Supplementary Figure 10) is similar to the estimates from SMPs with fixed  
580 rates in Figure 6 (blue lines). When the region-level methylation process is taken  
581 into account (orange lines in Supplementary Figure 10), the inferred demography  
582 is similar to that of the Figure 6 (green lines). In the case where we infer the  
583 epimutation rates (sites and region) the demographic history inference is not im-  
584 proved compared to that estimated using SNPs only (Supplementary Figure 10,  
585 green and red lines) while the inferred epimutation rates are smaller than expected  
586 (Supplementary Table 11 and 12), but the ratio of site to region epimutation rates

587 is consistent with empirical estimates [18].

588

## 589 Discussion

590 Current approaches analyzing whole genome sequences rely on statistics derived  
591 from the distribution of ancestral recombination graphs [23, 64, 37, 68, 10, 80, 66,  
592 34]. In this study we present a new SMC method that combines SNP data with  
593 other types of genomic (TEs, microsatellites) and epigenomic (DNA methylation)  
594 markers. We focus mainly on the inclusion of genomic markers whose mutation  
595 rates exceed the DNA point mutation rate, as such (hyper-mutable) markers can  
596 provide increased temporal resolution in the recent evolutionary past of popula-  
597 tions, and aid in the identification of demographic changes (*e.g.* population bottle-  
598 necks). We demonstrate that by integrating multiple heritable genomic markers,  
599 the population size variation in very recent time can be more accurately recover-  
600 ed (outperforming any other methods given the amount of data used in this  
601 study [71, 66]). Our results indicate that correctly integrating multiple genomic  
602 marker can improve TRMCA inference, which is becoming a field of high interest  
603 [37, 26, 44]. Our simulations demonstrate that if the SNP mutation rate is known,  
604 the mutation rate of other markers can be recovered (under the condition that  
605 the marker follow all hypotheses described in Figure 1). Moreover, our method  
606 accounts for the finite site problem that arises at reversible (hyper-mutable) mark-  
607 ers and/or where effective population size is high [70, 72]. Overall, the simulator  
608 and SMC methods presented here therefore pave the way for a rigorous statistical  
609 framework to test if a common ARG can explain the observed diversity patterns  
610 under the model hypotheses laid out in Figure 1. We find that comparisons of LD  
611 for different markers along the genome is a useful way to assess violations of our  
612 model assumptions.

613 As proof of principle, we apply our approach on data originating from whole  
614 genome and methylome data of *A. thaliana* natural accessions (focusing on CG  
615 context in genic regions, as in [74, 83, 84]). Indeed, *A. thaliana* presents the  
616 largest genetic and epigenetic data-set of high quality. Additionally the methyl-  
617 ation states in CG context has been proven mainly heritable and is well documented  
618 [18, 25, 73]. We first investigate the distribution of epimutations along the genomes.  
619 Our model-based approach provides strong evidence that DMRs cannot simply  
620 emerge from spontaneous site-level epimutations that arise according to a Poisson  
621 processes along genome. Instead, stochastic changes in region-level methylation  
622 states must be the outcome of spontaneous methylation and demethylation events  
623 that operate at both the site- and region-level (as corroborated by [54, 11, 43]).  
624 Our epimutation model cannot fully describe the observed diversity of epimuta-  
625 tions along the genome [18], meaning that the epimutation processes may indeed  
626 be more complex than expected [18, 25, 11, 43]. We observe non-independence be-

627 tween annotated methylation sites spanning genomic regions larger than the span  
628 of the underlying genealogy (determined by recombination events) which no model  
629 can currently describe. Additionally, we find high LD between SMPs over short  
630 distances which does not appear in our simulations (simulation performed under  
631 the current measures of epimutation rates). Thus, methylation probably violate  
632 the assumptions of a Poisson process distribution along the genome and in time  
633 (*i.e.* Figure 1), in line with recent functional studies [54, 25, 42, 43]. We thus  
634 further caution against conclusions on the role of natural (purifying) selection [49]  
635 or its absence [74] based on population epigenomic data due to the violation of  
636 the above mentioned assumptions. Additionally we suspect those model violations  
637 to explain the discrepancy between epimutation rates we inferred and the ones  
638 measured experimentally [73, 18]. To solve this discrepancy, one would need to de-  
639 velop a theoretical epimutation model capable of describing the observed diversity  
640 at the evolutionary time scale and then use this model to reanalyse the sequence  
641 data from the biological experiment to re-estimate the epimutation rates. We thus  
642 suggest a possible way forward for modeling epimutations through an Ising model  
643 [86] to account for the heterogeneous methylation process. However, our prelim-  
644 inary work and the simulation results in [11], indicate that such model generates  
645 non-homogeneous mutation process in space (*i.e.* along the genome) and time, vi-  
646 olating our current SMC assumptions (Figure 1C and D). Hence, there is a need  
647 to develop a more realistic methylation model for epimutations. A model account-  
648 ing for heterogeneous rates would probably need to rely on a more sophisticated  
649 HMM (*e.g.* continuous time Markov chains [35] for SMC approaches) than what is  
650 presented here or to use other full genome inference methods (see [37]) which are  
651 not constrained by the SMC assumptions (Figure 1) but depends on simulations.

652  
653 Interestingly, the distance of LD decay for SMPs matches quite well the es-  
654 timated distance between recombination events (Figure 4). In addition to our  
655 theoretical results in Table 2, this observation reinforces the usefulness of using  
656 SMPs (or any hyper-mutable marker) to improve estimates of the recombination  
657 rate along the genome in species where the per site DNA mutation rate ( $\mu$ ) is  
658 smaller than the per site recombination rate ( $r$ ) as in *A. thaliana*.

659  
660 Nonetheless, we find that a restricted focus on segregating SMPs in genic re-  
661 gions could meet our model assumptions reasonably well, and thus provides a  
662 promising way forward. Using these segregating SMPs, we recover a past demo-  
663 graphic bottleneck followed by an expansion which could fit the post- Last Glacial  
664 Maximum (LGM) colonization of Europe (although caution must be taken con-  
665 cerning the reliability of those results as pointed above), a hypothesized scenario  
666 [21] which could not be clearly identified using SNPs only from European (relic  
667 and non-relic) accessions [12]. Currently strong evidence from inference methods  
668 are lacking ([12], Figure 4 in [19]). Indeed, beyond the limits of using SNPs only,  
669 current results are limited by theoretical frameworks unable to simultaneously ac-

670 count (and disentangle) for extensive background selection (reinforced by very high  
671 selfing), population structure and variation in molecular rates (*e.g.* mutation rates,  
672 [48]), which are all known to be present in *A. thaliana*. Those various forces are  
673 known to bias inference results when non-accounted for [15, 55], and may explain  
674 the variance in our demographic estimates. We note also that using CG methylated  
675 sites in genic regions may be problematic as the typical genealogies at these loci  
676 could be shorter than the genome average due to the presence of background se-  
677 lection, thus making the inference of such short TMRCA more difficult (even with  
678 SMPs) than in non-coding regions (which do not harbour desirable CG methyl-  
679 ation sites, [73, 74, 83]).

680  
681 We suggest that simultaneously accounting for multiple heritable markers can  
682 help disentangle between different evolutionary forces, such as between selection  
683 and variation in mutation rate: selection has a local effect on the population geneal-  
684 ogy, while the mutation rate variation would only locally affect that given marker  
685 but not the genealogy [15]. The absence of conflicting demography inferred from  
686 SNPs and from methylation confirms at the time scale of thousands of generations,  
687 CG methylation sites are mainly heritable and can be modeled using population  
688 genetics theory [14, 74] (but see [54]) and used to estimate divergence between  
689 lineages [84, 83]. In other words fast ecological local adaptation [59] and response  
690 to stresses [67] may likely not be prominent forces endlessly reshaping CG methy-  
691 lation patterns (non-heritability in Figure 1B).

692  
693 Overall, our results demonstrate that our approach can be used in different  
694 cases. If the epimutations/genomic markers evolutionary mechanisms are not well  
695 understood [54, 11, 43], our approach provides inference tools to study the mark-  
696 ers' rates and distribution process along the genome, without requiring additional  
697 experimental data. If the evolution of epimutations/genomic markers are well  
698 understood (including a measure of the mutation rates) and can be modeled to  
699 described the observed intra-population diversity, these can be integrated to im-  
700 prove the SMC performance. Hence when applying our approach to genome-wide  
701 genetic and epigenetic data, it is advisable to use accurately annotated markers  
702 with, if possible, information regarding their inheritance and mutational proper-  
703 ties. Regarding methylation specifically, while the set of gene body methylated  
704 genes previously used [74, 84] are likely the optimal choice [83], these are too few  
705 and too scattered across the genome to maximize the statistical power of SMC  
706 methods. We therefore use methylation sites at all genic regions. Yet, despite the  
707 wealth of functional studies and data on methylation in *A. thaliana*, the distri-  
708 bution of epimutations is not fully understood [25, 54], but independent rates for  
709 sites and region-level have been estimated [73, 18, 84]. We note here the promising  
710 methylation modelling framework by [11, 43], albeit it does not yet consider evo-  
711 lutionary processes at the population level. Our results shed light on the inference  
712 accuracy in presence of site and region-level epimutations when occurring at similar



713 rates (Supplementary Figure 7). When accounting for region-level epimutations,  
714 our algorithm requires to first infer via an HMM the methylation status of a region  
715 in order to later-on compute the epimutation probabilities (*i.e* the emission matrix  
716 of the SMC HMM). Hence, in presence of site and region-level epimutations occur-  
717 ring at similar rates, recovering the region methylation status becomes harder as  
718 methylated sites are observed in the unmethylated regions (and unmethylated sites  
719 observed in the methylated regions). The mislabelling of the region methylation  
720 status lead to accuracy loss due to the use of the wrong emission probability at  
721 the later steps of the SMC inference (Forward-Backward algorithm). In the case  
722 where epimutation rates are freely inferred, their values are based on the estimated  
723 methylation region status. Therefore, even if the inferred rates are incorrect, these  
724 are sufficiently consistent with the inferred region methylation status to contain  
725 information and slightly improve inference accuracy. Additionally, extra care must  
726 be taken when dealing with epigenomic data in other species as the SMP calling  
727 might not be as simple as for *Arabidopsis thaliana* due to potential difference of  
728 methylation between different tissues or pool of cells. Similarly, we ignore here the  
729 potential dependence between SNPs and SMPs, as more empirical evidence (and  
730 modelling) is required to quantify the potential interaction between both muta-  
731 tional processes.

732

733 On a brighter note, with the release of new sequencing technology [39], long and  
734 accurate reads are becoming accessible, leading to the availability of high quality  
735 reference genomes for model and non-model species alike [51, 7]. Additionally, the  
736 quality of re-sequencing (population sample) genome data and their annotations  
737 is enhanced so that additional markers such as transposable elements, insertion,  
738 deletion or microsatellites can be called with increasing confidence. These accurate  
739 genomes will provide access to new classes of genomic markers that span the entire  
740 mutational spectrum. We therefore suspect in the near future an improvement in  
741 our understanding of the heritability of many markers besides SNPs. Adding other  
742 genomic markers besides SNPs will improve full genome approaches, which are cur-  
743 rently limited by the observed nucleotide diversity [34, 66, 62]. Additionally, the  
744 potential complexity resulting by integrating multiple independent markers could  
745 be tackled by the use of continuous time Markov chains for the emission matrix.  
746 We predict that our results pave the way to improve the inference of 1) biological  
747 traits or recombination rate through time [17, 68], 2) multiple merger events [37],  
748 and 3) recombination and mutation rate maps [5, 4]. Our method also should help  
749 to dissect the effect of evolutionary forces on genomic diversity [32, 31], and to  
750 improve the simultaneous detection, quantification and dating of selection events  
751 [1, 8, 30].

752

753 Hence, there is no doubt that extending our work, by simultaneously integrat-  
754 ing diverse types of genomic markers into other theoretical framework (*e.g.* ABC  
755 approaches), likely represents the future of population genomics, especially to study

756 species for which many thousands of samples cannot be obtained. We believe our  
757 approach helps to develop more general classes of models capable of leveraging  
758 information from any type and amount of diversity observed in sequencing data,  
759 and thus to challenge our current understanding of genome evolution.  
760

## 761 **Materials and Methods**

### 762 **Simulating two genomic markers**

763 The sequence is written as a sequence of markers with a given state. Each site is  
764 annotated as  $MXSY$ , where  $X$  indicates the marker type and  $Y$  the current state  
765 of that marker: for example M1S1 indicate at this position a marker of type 1 in the  
766 state 1. To simulate sequence of theoretical marker we start by simulating an ARG  
767 which is then split in a series of genealogies (*i.e.* a sequence of coalescent trees)  
768 along the chromosome and create an ancestral sequence (based on equilibrium  
769 probability of marker states). Mutation events (nucleotides or epimutations for  
770 methylable cytosine) are then added when going along the sequence, *i.e.* along the  
771 series of genealogies. The ancestral sequence is thus modified by mutation event  
772 assuming a finite site model [82] conditioned to the branch length and topology of  
773 the genealogies. Each leaf of the genealogy is one of the  $n$  samples. Our model has  
774 thus two important features: 1) markers are independent from one another, and  
775 2) a given marker has a polymorphism distribution between samples (frequencies  
776 of alleles) determined by one given genealogy. The simulator can be found in the  
777 latest version of eSMC2 R package (<https://github.com/TPPSellinger/eSMC2>).

### 778 **Simulating methylome data**

779 We now focus on methylation data located at cytosine in CG context within genic  
780 regions. Only, CG sites in those regions are considered "methylable", and CG  
781 sites outside those defined genic regions do not have a methylation status and  
782 are considered "unmethylable". We vary the percentage of CG site with methyla-  
783 tion state annotated from 2 to 20% of the sequence length. The simulator can in  
784 principle simulate epimutations in different methylation context and different rates  
785 [41, 16, 87, 85]. We simulate epimutations as described above but with asymmetric  
786 rates: the methylation rate per site is  $\mu_{SM} = 3.5 \times 10^{-4}$ , and the demethyla-  
787 tion rate per site is  $\mu_{SM} = 1.5 \times 10^{-3}$  [73, 18]. For simplicity and computational  
788 tractability, we assume that when an epimutation occurs, it occurs on both DNA  
789 strands which then present the same information. In other words, for a haploid  
790 individual, a cytosine site can only be methylated or unmethylated (as in [69]).  
791 For region level epimutations, the region length is either 1kbp [49] or 150 bp [18].  
792 The region level methylation and demethylation rates are set to  $\mu_{RM} = 2 \times 10^{-4}$   
793 and  $\mu_{RU} = 10^{-3}$  respectively (similar to rates measured in *A. thaliana*, [18]). In

794 addition to this, unlike for theoretical marker described above, mutations, site and  
795 region epimutations can occur at the same position of the sequence.

796

797 To simulate methylation data, we start with an ancestral sequence of random  
798 nucleotide and then randomly select regions in which CG sites have their methy-  
799 lation state annotated (representing the genic regions). Cytosine in CG context  
800 in those regions are either methylated or unmethylated (noted as M or U). Cy-  
801 tosine in other context or regions are considered as unmethylated (and noted as  
802 C). The ancestral methylation state is then randomly attributed according to the  
803 equilibrium probabilities. Our simulator then introduces DNA mutations, site- and  
804 region-epimutations in a similar way as described above.

## 805 SMC Methods

806 All three methods (eSMC2, SMCtheo and SMCm) are based on the same mathe-  
807 matical foundations and implemented in a similar way within the eSMC2 R package  
808 (<https://github.com/TPPSellinger>) [68, 37, 64]. This allows to specifically quan-  
809 tify the accuracy gained by accounting for multiple genomic markers.

## 810 SMC optimization function

811 All current SMC approach rely on the Baum-Welch (BW) algorithm for parameter  
812 estimation in order to reduce computational load (as described in [71]). Yet, the  
813 Baum-Welch algorithm is an Expectation-Maximization algorithm, and can hence  
814 fall in local extrema when optimizing the likelihood. We alternatively extend SM-  
815 Ctheo to estimate parameters by directly optimizing the likelihood (LH) at the  
816 greater cost of computation time (even when using the speeding techniques de-  
817 scribed in [57]). We run this approach on a sub-sample of size six haploid genomes  
818 to limit the required computational time.

## 819 eSMC2 and MSMC2

820 SMC methods based on the PSMC' [58], such as eSMC2 and MSMC2, focus on the  
821 coalescent events between two individuals (*i.e.* two haploid genomes or one diploid  
822 genome). The algorithm moves along the sequence and estimates the coalescence  
823 time at each position by assessing whether the two sequences are similar or different  
824 at each position. If the two sequences are different, this indicates a mutation took  
825 place in the genealogy of the sample. The intuition being that the absence of  
826 mutations (*i.e.* the two sequences are identical) is likely due to a recent common  
827 ancestor between the sequences, and the presence of several mutations likely reflects  
828 that the most recent common ancestor of the two sequences is distant in the past.  
829 In the event of recombination, there is a break in the current genealogy and the  
830 coalescence time consequently takes a new value according to the model parameters  
831 [46, 58]. A detailed description of the algorithm can be found in [45, 63].

## 832 **SMCtheo based on several genomic markers**

833 Our SMCtheo approach is equivalent to PSMC' but take as input a sequence of  
834 several genomic markers. The algorithm goes along a pair of haploid genomes and  
835 checks at each position which marker is observed and then if both states of the  
836 marker are identical or not. The approach is identical to the one described above,  
837 except that the probability of both sequences to be identical at one site depends on  
838 the mutation rate of the marker at this site (equation 1). While the mutation rates  
839 for many heritable genomic markers are unknown, there is an increasing amount  
840 of measures of the DNA (SNP) mutation rate for many species. Our SMCtheo  
841 approach is able to leverage the information from the distribution of one theoretical  
842 marker (*e.g.* mutations for SNPs) to infer the mutation rate of the other marker  
843 2 (assuming both mutation rates to be symmetrical). If more than 1% of sites are  
844 polymorphic in a sequence we use the finite site assumption. If not, then from  
845 the diversity observed, the different mutation rates can be recovered by simply  
846 comparing Waterson's theta ( $\theta_W$ ) between the reference marker (*i.e.* with known  
847 rate) and the marker with the unknown rates. For example, if the diversity ( $\theta_W$ )  
848 at marker 2 is smaller by a factor ten than the reference marker 1 (and no marker  
849 violates the infinite site hypothesis), the mutation rate of marker 2 is inferred to  
850 be ten times smaller (corrected by the number of possible states). However, if the  
851 marker 2 violates the infinite site hypothesis, a Baum-Welch algorithm is run to  
852 infer the most likely mutation rates under the SMC to overcome this issue (the  
853 Baum-Welch algorithm description can be found in [63]).

## 854 **SMCm**

855 When integrating epimutations, the number of possible observations increases com-  
856 pare to eSMC2. As in eSMC2, if the two nucleotides (DNA mutation) at one  
857 position are identical at a non methylable site, we indicate this as 0. If the two nu-  
858 cleotides are different, it is indicated as 1 (*i.e.* a DNA mutation occurred). When  
859 assuming site-level epimutation only, three possible observations are possible at a  
860 given methylable position: 1) if the two cytosines from the two chromosomes are  
861 unmethylated, it is indicated as a 2, 2) if the two cytosines are methylated, it is  
862 indicated as a 3, and 3) if at a position a cytosine is methylated and the other  
863 one unmethylated, it is indicated as a 4. Depending on the mutation, methylat-  
864 ion and, demethylation rates, different frequencies of these states are possible in  
865 the sample of sequences, which provide information on the emission rate in the  
866 SMC method. When both site- and region-level methylation processes occur, the  
867 methylation state is conditioned by the region level methylation state (increasing  
868 the number of possible observation to 9)

869 To choose the appropriate settings for SMCm (*i.e.* if there are region level  
870 epimutations), we test if the methylation state are distributed independently from  
871 one another along one genome. In absence of region methylation effect, the prob-

872 ability at each site (position) to be methylated or unmethylated should be inde-  
873 pendent from the previous position (or any other position). Conversely, if there  
874 is a region effect on epimutation, two consecutive sites along one genome would  
875 exhibit a positive correlation in their methylated states (and across pairs of se-  
876 quences). We therefore calculate the probability that two successive positions with  
877 an annotated methylation state would be identical under a binomial distribution of  
878 methylation along a given genome. We then compare theoretical expectations to  
879 the observed data and build the statistical test based on a binomial distribution of  
880 probabilities. If existence of region level epimutation is detected, the regions level  
881 methylation states are recovered through a hidden markov model (HMM) similarly  
882 to [65, 18, 69]. Note that this HMM model does not include information from  
883 epimutation rates known from empirical studies. The complete description of the  
884 mathematical models and probabilities are in the supplementary material Text S1.  
885

886 We postulate that the epimutation rates remain unknown in most species, while  
887 the DNA mutation rate may be known (or approximated based on a closely related  
888 species). Hence, we develop an approach based on the SMC capable of leverag-  
889 ing information from the distribution of DNA mutations to infer the epimutation  
890 rates (similar to what is described above). Our approach first tests if epimutations  
891 violates or not the infinite site assumptions. If less than 1% of sites with their  
892 methylation state annotated are polymorphic in a sequence we use the infinite site  
893 assumption: the site and region level epimutation rates can be recovered straight-  
894 forwardly from the observed diversity ( $\theta_W$ , see above) . Otherwise, a Baum-Welch  
895 algorithm is run to infer the most likely epimutation rates (site rate for SMP, and  
896 region rates for DMRs) [73, 74, 69].

### 897 **Calculation of the root mean square error (RMSE)**

898 To quantify the accuracy of each demographic inference we evaluate the root mean  
899 square error (RMSE). To do so we choose a hundred points uniformly spread across  
900 the time window (in  $\log_{10}$  scale), and compare the actual population size and the  
901 one estimated by a given method at each of these points. We thus have the following  
902 formula:

$$RMSE = \sqrt{\frac{\sum_{i=1}^{10^2} (y_i - y_i^*)^2}{10^2}}, \quad (2)$$

903 where  $y_i$  is the true population size at the time point  $i$ , and  $y_i^*$  is the estimated  
904 population size at the time point  $i$ .

## 905 Inference of the Time to the Most Recent Common Ancestor (TM- 906 RCA)

907 To infer the TMRCA at each position of the genome we use an approach similar  
908 to the PSMC' described in [58]. We first run a forward and backward algorithm  
909 on our sequence data (see appendix of [63, 71] for computation details). From  
910 the output results we calculate the probability to be in each hidden state at each  
911 position of the genome (note that the output product of the forward backward  
912 algorithm is rescaled so that the sum of probability is one), which we use to compute  
913 the expected coalescent time at each position on the genome using the following  
914 formula:

$$TMRCA_i = \sum_{j=1}^n fo_{i,j} \times ba_{i,j} \times Tc_j, \quad (3)$$

915 with  $i$  is the position on the genome,  $j$  is the hidden state index,  $n$  is the number  
916 of hidden state,  $fo$  is the output from the forward algorithm,  $ba$  is the output from  
917 the backward algorithm,  $\sum_{j=1}^n fo_{i,j} \times ba_{i,j} = 1$ , and  $Tc$  is a vector containing all  
918 the hidden states (*i.e.* coalescent times).

## 919 Sequence data of *Arabidopsis thaliana*

920 We download genome and methylome data of *A. thaliana* from the 1001 genome  
921 project [12]. We select 10 individuals from the German accessions respectively  
922 corresponding to the accession numbers: 9783, 9794, 9808, 9809, 9810, 9811, 9812,  
923 9816, 9813, 9814. We only keep methylome data in CG context and in genic regions  
924 [74, 18]. The genic regions are based on the current reference genome TAIR 10.1.  
925 The SNPs and epimutations are called according to previously published pipeline  
926 [69, 18]. As in previous studies [63, 22, 19], we assume *A. thaliana* data to be  
927 haploid due to high homozygosity (caused by high selfing rate). The resulting  
928 files are available on GitHub at <https://github.com/TPPSellinger>. To perform  
929 analysis we chose  $\mu = 6.95 \times 10^{-9}$  per generation per bp as the DNA mutation  
930 rate [52] and  $r = 3.6 \times 10^{-8}$  as the recombination rate [56] per generation per bp.  
931 In order to have the most realistic model, we assume that the methylome of *A.*  
932 *thaliana* undergoes both region (RMM) and site (SMM) level epimutations [18].  
933 When fixed, we respectively set the site methylation and demethylation rate to  
934  $\mu_{SM} = 3.48 \times 10^{-4}$  and  $\mu_{SU} = 1.47 \times 10^{-3}$  per generation per bp according to  
935 [73]. We additionally set the region level methylation and demethylation rate to  
936  $\mu_{RM} = 1.6 \times 10^{-4}$  and  $\mu_{RU} = 9.5 \times 10^{-4}$  per generation per bp according to [18].  
937 Because we do not account for the effect of variable mutation or recombination rate  
938 along the genome, we cut the five chromosome of *A. thaliana* into eight smaller  
939 scaffolds [4, 5]. By doing this we remove centromeric regions and limit the effect  
940 the variation of mutation and recombination rate along the genome. The selected

941 regions and the SNP density (from the German accessions) are represented in  
942 Supplementary Figures 11 to 15.

## 943 Data Availability

944 eSMC2 R package can be found at : <https://github.com/TPPSellinger/eSMC2> .  
945 The input files created from *Arabidopsis thaliana* sequence data are available on  
946 GitHub at : [https://github.com/TPPSellinger/Arabidopsis\\_thaliana\\_methylation](https://github.com/TPPSellinger/Arabidopsis_thaliana_methylation)  
947 .

## 948 Acknowledgments

949 We thank Zhilin Zhang and Rashmi Hazarika for giving and processing the data  
950 of *Arabidopsis thaliana*. TS is supported by the Deutsche Forschungsgemeinschaft,  
951 project number 317616126 (TE809/7-1) to AT, and the Austrian Science Fund  
952 (project no. TAI 151-B) to Anja Hörger.

## 953 References

- 954 [1] P. K. Albers and G. McVean. Dating genomic variants and shared ancestry in  
955 population-scale sequencing data. *PLOS BIOLOGY*, 18(1), JAN 2020. ISSN  
956 1544-9173. doi: 10.1371/journal.pbio.3000586.
- 957 [2] C. Alonso-Blanco, J. Andrade, C. Becker, F. Bemm, J. Bergelson, K. M.  
958 Borgwardt, J. Cao, E. Chae, T. M. DeZwaan, W. Ding, et al. 1,135 genomes  
959 reveal the global pattern of polymorphism in *Arabidopsis thaliana*. *Cell*, 166  
960 (2):481–491, 2016.
- 961 [3] T. Anzai, T. Shiina, N. Kimura, K. Yanagiya, S. Kohara, A. Shigenari, T. Ya-  
962 magata, J. K. Kulski, T. K. Naruse, Y. Fujimori, et al. Comparative sequenc-  
963 ing of human and chimpanzee mhc class i regions unveils insertions/deletions  
964 as the major path to genomic divergence. *Proceedings of the National Academy*  
965 *of Sciences*, 100(13):7708–7713, 2003.
- 966 [4] G. V. Barroso and J. Y. Dutheil. Mutation rate variation shapes genome-  
967 wide diversity in *Drosophila melanogaster*. Sept. 2021. doi: 10.1101/2021.09.  
968 16.460667. URL [http://biorxiv.org/lookup/doi/10.1101/2021.09.16.](http://biorxiv.org/lookup/doi/10.1101/2021.09.16.460667)  
969 460667.
- 970 [5] G. V. Barroso, N. Puzovic, and J. Y. Dutheil. Inference of recombination maps  
971 from a single pair of genomes and its application to ancient samples. *PLOS*  
972 *Genetics*, 15(11), NOV 2019. ISSN 1553-7404. doi: {10.1371/journal.pgen.  
973 1008449;10.1371/journal.pgen.1008449.r001;10.1371/journal.pgen.1008449.  
974 r002;10.1371/journal.pgen.1008449.r003;10.1371/journal.pgen.1008449.r004}.

- 975 [6] F. Baumdicker, G. Bisschop, D. Goldstein, G. Gower, A. P. Ragsdale,  
976 G. Tsambos, S. Zhu, B. Eldon, E. C. Ellerman, J. G. Galloway, A. L.  
977 Gladstein, G. Gorjanc, B. Guo, B. Jeffery, W. W. Kretzschumar, K. Lohse,  
978 M. Matschiner, D. Nelson, N. S. Pope, C. D. Quinto-Cortes, M. F. Rodrigues,  
979 K. Saunack, T. Sellinger, K. Thornton, H. van Kemenade, A. W. Wohns,  
980 Y. Wong, S. Gravel, A. D. Kern, J. Koskela, P. L. Ralph, and J. Kelleher.  
981 Efficient ancestry and mutation simulation with msprime 1.0. *GENETICS*,  
982 220(3), MAR 3 2022. ISSN 0016-6731. doi: 10.1093/genetics/iyab229.
- 983 [7] A. C. Beichman, E. Huerta-Sanchez, and K. E. Lohmueller. Using Genomic  
984 Data to Infer Historic Population Dynamics of Nonmodel Organisms. In  
985 Futuyma, DJ, editor, *Annual Review of Ecology, Evolution, and Systemat-*  
986 *ics, VOL 49*, volume 49 of *Annual Review of Ecology Evolution and Sys-*  
987 *tematics*, pages 433–456. 2018. ISBN 978-0-8243-1449-1. doi: {10.1146/  
988 annurev-ecolsys-110617-062431}.
- 989 [8] G. Bisschop, K. Lohse, and D. Setter. Sweeps in time: leveraging the joint  
990 distribution of branch lengths. *GENETICS*, 219(2), OCT 2021. ISSN 0016-  
991 6731. doi: 10.1093/genetics/iyab119.
- 992 [9] S. Boitard, W. Rodríguez, F. Jay, S. Mona, and F. Austerlitz. Inferring pop-  
993 ulation size history from large samples of genome-wide molecular data - an  
994 approximate bayesian computation approach. 12(3):e1005877. ISSN 1553-  
995 7404. doi: 10.1371/journal.pgen.1005877. URL [https://dx.plos.org/10.](https://dx.plos.org/10.1371/journal.pgen.1005877)  
996 [1371/journal.pgen.1005877](https://dx.plos.org/10.1371/journal.pgen.1005877).
- 997 [10] D. Y. C. Brandt, X. Wei, Y. Deng, A. H. Vaughn, and R. Nielsen. Evaluation  
998 of methods for estimating coalescence times using ancestral recombination  
999 graphs. *GENETICS*, 221(1), MAY 5 2022. ISSN 0016-6731. doi: 10.1093/  
1000 genetics/iyac044.
- 1001 [11] A. Briffa, E. Hollwey, Z. Shahzad, J. D. Moore, D. B. Lyons, M. Howard, and  
1002 D. Zilberman. Millennia-long epigenetic fluctuations generate intragenic dna  
1003 methylation variance in arabidopsis populations. *Cell Systems*, 2023.
- 1004 [12] J. Cao, K. Schneeberger, S. Ossowski, T. Günther, S. Bender, J. Fitz,  
1005 D. Koenig, C. Lanz, O. Stegle, C. Lippert, et al. Whole-genome sequenc-  
1006 ing of multiple Arabidopsis thaliana populations. *Nature Genetics*, 43(10):  
1007 956–U60, OCT 2011. ISSN 1061-4036. doi: {10.1038/ng.911}.
- 1008 [13] B. Charlesworth and D. Charlesworth. Elements of evolutionary genetics.  
1009 2010.
- 1010 [14] B. Charlesworth and K. Jain. Purifying Selection, Drift, and Reversible Mu-  
1011 tation with Arbitrarily High Mutation Rates. *Genetics*, 198(4):1587+, DEC  
1012 2014. ISSN 0016-6731. doi: {10.1534/genetics.114.167973}.



- 1013 [15] B. Charlesworth and J. D. Jensen. Population genetic considerations regarding  
1014 evidence for biased mutation rates in arabidopsis thaliana. *Molecular Biology*  
1015 *and Evolution*, 40(2):msac275, 2023.
- 1016 [16] S. J. Cokus, S. Feng, X. Zhang, Z. Chen, B. Merriman, C. D. Haudenschild,  
1017 S. Pradhan, S. F. Nelson, M. Pellegrini, and S. E. Jacobsen. Shotgun bisulphite  
1018 sequencing of the arabidopsis genome reveals dna methylation patterning. *Nature*,  
1019 452(7184):215–219, 2008.
- 1020 [17] Y. Deng, Y. S. Song, and R. Nielsen. The distribution of waiting distances  
1021 in ancestral recombination graphs. *THEORETICAL POPULATION BIOLOGY*,  
1022 141:34–43, OCT 2021. ISSN 0040-5809. doi: {10.1016/j.tpb.2021.06.  
1023 003}.
- 1024 [18] J. Denkena, F. Johannes, and M. Colome-Tatche. Region-level epimutation  
1025 rates in arabidopsis thaliana. *HEREDITY*, 127(2):190–202, AUG 2021. ISSN  
1026 0018-067X. doi: 10.1038/s41437-021-00441-w.
- 1027 [19] A. Durvasula, A. Fulgione, R. M. Gutaker, S. I. Alacakaptan, P. J. Flood,  
1028 C. Neto, T. Tsuchimatsu, H. A. Burbano, F. X. Picó, C. Alonso-Blanco, et al.  
1029 African genomes illuminate the early history and transition to selfing in ara-  
1030 bidopsis thaliana. *Proceedings of the National Academy of Sciences*, 114(20):  
1031 5213–5218, 2017.
- 1032 [20] A. Estoup, P. Jarne, and J.-M. Cornuet. Homoplasy and mutation model  
1033 at microsatellite loci and their consequences for population genetics analysis.  
1034 *Molecular ecology*, 11(9):1591–1604, 2002.
- 1035 [21] O. François, M. G. B. Blum, M. Jakobsson, and N. A. Rosenberg. De-  
1036 mographic history of european populations of arabidopsis thaliana. *PLOS*  
1037 *Genetics*, 4:1–15, 05 2008. URL <https://doi.org/10.1371/journal.pgen.1000075>.
- 1039 [22] A. Fulgione, M. Koornneef, F. Roux, J. Hermisson, and A. M. Hancock.  
1040 Madeiran Arabidopsis thaliana Reveals Ancient Long-Range Colonization and  
1041 Clarifies Demography in Eurasia. *Molecular Biology and Evolution*, 35(3):564–  
1042 574, MAR 2018. ISSN 0737-4038. doi: {10.1093/molbev/msx300}.
- 1043 [23] L. Gattepaille, T. Guenther, and M. Jakobsson. Inferring Past Effective Pop-  
1044 ulation Size from Distributions of Coalescent Times. *Molecular Biology and*  
1045 *Evolution*, 204(3):1191+, NOV 2016. ISSN 0016-6731. doi: {10.1534/genetics.  
1046 115.185058}.
- 1047 [24] L. M. Gattepaille, M. Jakobsson, and M. G. B. Blum. Inferring population  
1048 size changes with sequence and SNP data: lessons from human bottlenecks.  
1049 *Heredity*, 110(5):409–419, MAY 2013. ISSN 0018-067X. doi: {10.1038/hdy.  
1050 2012.120}.

- 1051 [25] R. R. Hazarika, M. Serra, Z. Zhang, Y. Zhang, R. J. Schmitz, and F. Johannes.  
1052 Molecular properties of epimutation hotspots. *Nature Plants*, 8(2):146–156,  
1053 2022.
- 1054 [26] M. J. Hubisz, A. L. Williams, and A. Siepel. Mapping gene flow between  
1055 ancient hominins through demography-aware inference of the ancestral re-  
1056 combination graph. *PLOS GENETICS*, 16(8), AUG 2020. ISSN 1553-7404.  
1057 doi: {10.1371/journal.pgen.1008895}.
- 1058 [27] R. Hudson. Properties of a neutral allele model with intragenic recombination.  
1059 *Theoretical Population Biology*, 23(2):183–201, 1983. ISSN 0040-5809. doi:  
1060 {10.1016/0040-5809(83)90013-8}.
- 1061 [28] F. Johannes. DNA methylation makes mutational history. *Nature Plants*, 5  
1062 (8):772–773, AUG 2019. ISSN 2055-026X. doi: {10.1038/s41477-019-0491-z}.
- 1063 [29] F. Johannes and R. J. Schmitz. Spontaneous epimutations in plants. *New*  
1064 *Phytologist*, 221(3):1253–1259, FEB 2019. ISSN 0028-646X. doi: {10.1111/  
1065 nph.15434}.
- 1066 [30] P. Johri, B. Charlesworth, and J. D. Jensen. Toward an evolutionarily  
1067 appropriate null model: Jointly inferring demography and purifying selec-  
1068 tion. *GENETICS*, 215(1):173–192, MAY 2020. ISSN 0016-6731. doi:  
1069 10.1534/genetics.119.303002.
- 1070 [31] P. Johri, K. Riall, H. Becher, L. Excoffier, B. Charlesworth, and J. D.  
1071 Jensen. The impact of purifying and background selection on the infer-  
1072 ence of population history: Problems and prospects. *MOLECULAR BIOL-  
1073 OGY AND EVOLUTION*, 38(7):2986–3003, JUL 2021. ISSN 0737-4038. doi:  
1074 10.1093/molbev/msab050.
- 1075 [32] P. Johri, C. F. Aquadro, M. Beaumont, B. Charlesworth, L. Excoffier, A. Eyre-  
1076 Walker, P. D. Keightley, M. Lynch, G. McVean, B. A. Payseur, S. P. Pfeifer,  
1077 W. Stephan, and J. D. Jensen. Recommendations for improving statistical  
1078 inference in population genomics. *PLOS Biology*, 20(5):e3001669, May 2022.  
1079 ISSN 1545-7885. doi: 10.1371/journal.pbio.3001669. URL [https://dx.plos.](https://dx.plos.org/10.1371/journal.pbio.3001669)  
1080 [org/10.1371/journal.pbio.3001669](https://dx.plos.org/10.1371/journal.pbio.3001669).
- 1081 [33] J. Kelleher, A. M. Etheridge, and G. McVean. Efficient Coalescent Simula-  
1082 tion and Genealogical Analysis for Large Sample Sizes. *PLOS Computational*  
1083 *Biology*, 12(5), MAY 2016. doi: {10.1371/journal.pcbi.1004842}.
- 1084 [34] J. Kelleher, Y. Wong, A. W. Wohns, C. Fadil, P. K. Albers, and G. McVean.  
1085 Inferring whole-genome histories in large population datasets (vol 51, pg 1330,  
1086 2019). *Nature Genetics*, 51(11):1660, NOV 2019. ISSN 1061-4036. doi: {10.  
1087 1038/s41588-019-0523-7}.

- 1088 [35] C. Ki and J. Terhorst. Exact decoding of the sequentially Markov coalescent. Sept. 2020. doi: 10.1101/2020.09.21.307355. URL <http://biorxiv.org/lookup/doi/10.1101/2020.09.21.307355>.
- 1089  
1090
- 1091 [36] J. Kingman. The Coalescent. *Stochastic Processes and their Applications*, 13, 1982.
- 1092
- 1093 [37] K. Korfmann, T. P. P. Sellinger, F. Freund, M. Fumagalli, and A. Tellier. Simultaneous inference of past demography and selection from the ancestral recombination graph under the beta coalescent. *bioRxiv*, 2022.
- 1094  
1095
- 1096 [38] K. Korfmann, O. E. Gaggiotti, and M. Fumagalli. Deep Learning in Population Genetics. *Genome Biology and Evolution*, 15(2), 01 2023. ISSN 1759-6653. doi: 10.1093/gbe/evad008. URL <https://doi.org/10.1093/gbe/evad008>.
- 1097  
1098  
1099
- 1100 [39] D. Lang, S. Zhang, P. Ren, F. Liang, Z. Sun, G. Meng, Y. Tan, X. Li, Q. Lai, L. Han, D. Wang, F. Hu, W. Wang, and S. Liu. Comparison of the two up-to-date sequencing technologies for genome assembly: Hifi reads of pacific biosciences sequel ii system and ultralong reads of oxford nanopore. *GIGASCIENCE*, 9(12), DEC 2020. ISSN 2047-217X. doi: 10.1093/gigascience/giaa123.
- 1101  
1102  
1103  
1104  
1105
- 1106 [40] H. Li and R. Durbin. Inference of human population history from individual whole-genome sequences. *Nature*, 475(7357):493–U84, JUL 28 2011. ISSN 0028-0836. doi: {10.1038/nature10231}.
- 1107  
1108
- 1109 [41] R. Lister, R. C. O’Malley, J. Tonti-Filippini, B. D. Gregory, C. C. Berry, A. H. Millar, and J. R. Ecker. Highly integrated single-base resolution maps of the epigenome in Arabidopsis. *Cell*, 133(3):523–536, MAY 2 2008. ISSN 0092-8674. doi: {10.1016/j.cell.2008.03.029}.
- 1110  
1111  
1112
- 1113 [42] D. B. Lyons, A. Briffa, S. He, J. Choi, E. Hollwey, J. Colicchio, I. Anderson, X. Feng, M. Howard, and D. Zilberman. Extensive de novo activity stabilizes epigenetic inheritance of cg methylation in arabidopsis transposons. *bioRxiv*, 2022. doi: 10.1101/2022.04.19.488736. URL <https://www.biorxiv.org/content/early/2022/04/19/2022.04.19.488736>.
- 1114  
1115  
1116  
1117
- 1118 [43] D. B. Lyons, A. Briffa, S. He, J. Choi, E. Hollwey, J. Colicchio, I. Anderson, X. Feng, M. Howard, and D. Zilberman. Extensive de novo activity stabilizes epigenetic inheritance of cg methylation in arabidopsis transposons. *Cell Reports*, 42(3), 2023.
- 1119  
1120  
1121
- 1122 [44] A. Mahmoudi, J. Koskela, J. Kelleher, Y.-b. Chan, and D. Balding. Bayesian inference of ancestral recombination graphs. *PLOS Computational Biology*, 18 (3):e1009960, 2022.
- 1123  
1124

- 1125 [45] A.-S. Malaspinas, M. C. Westaway, C. Muller, V. C. Sousa, O. Lao, I. Alves,  
1126 A. Bergström, G. Athanasiadis, J. Y. Cheng, J. E. Crawford, et al. A genomic  
1127 history of aboriginal australia. *Nature*, 538(7624):207–214, 2016.
- 1128 [46] P. Marjoram and J. Wall. Fast “coalescent” simulation. *BMC Genetics*, 7,  
1129 MAR 15 2006. ISSN 1471-2156. doi: {10.1186/1471-2156-7-16}.
- 1130 [47] G. McVean and N. Cardin. Approximating the coalescent with recombina-  
1131 tion. *Philosophical Transactions of the Royal Society B-Biological Sciences*,  
1132 360(1459):1387–1393, JUL 29 2005. ISSN 0962-8436. doi: {10.1098/rstb.  
1133 20053.1673}.
- 1134 [48] J. G. Monroe, T. Srikant, P. Carbonell-Bejerano, C. Becker, M. Lensink,  
1135 M. Exposito-Alonso, M. Klein, J. Hildebrandt, M. Neumann, D. Kliebenstein,  
1136 M.-L. Weng, E. Imbert, J. Agren, M. T. Rutter, C. B. Fenster, and D. Weigel.  
1137 Mutation bias reflects natural selection in arabidopsis thaliana. *NATURE*, 602  
1138 (7895):101+, FEB 3 2022. ISSN 0028-0836. doi: 10.1038/s41586-021-04269-6.
- 1139 [49] A. Muyle, J. Ross-Ibarra, D. K. Seymour, and B. S. Gaut. Gene body methy-  
1140 lation is under selection in arabidopsis thaliana. *Genetics*, 218(2):iyab061,  
1141 2021.
- 1142 [50] M. Nordborg. Linkage disequilibrium, gene trees and selfing: An ancestral re-  
1143 combination graph with partial self-fertilization. *Molecular Biology and Evo-*  
1144 *lution*, 154(2):923–929, FEB 2000. ISSN 0016-6731.
- 1145 [51] S. Nurk, B. P. Walenz, A. Rhie, M. R. Vollger, G. A. Logsdon, R. Grothe,  
1146 K. H. Miga, E. E. Eichler, A. M. Phillippy, and S. Koren. Hicnu: accurate  
1147 assembly of segmental duplications, satellites, and allelic variants from high-  
1148 fidelity long reads. *GENOME RESEARCH*, 30(9):1291–1305, SEP 2020. ISSN  
1149 1088-9051. doi: 10.1101/gr.263566.120.
- 1150 [52] S. Ossowski, K. Schneeberger, J. I. Lucas-Lledo, N. Warthmann, R. M. Clark,  
1151 R. G. Shaw, D. Weigel, and M. Lynch. The Rate and Molecular Spectrum  
1152 of Spontaneous Mutations in Arabidopsis thaliana. *Science*, 327(5961):92–94,  
1153 JAN 1 2010. ISSN 0036-8075. doi: {10.1126/science.1180677}.
- 1154 [53] S. Ou, W. Su, Y. Liao, K. Chougule, J. R. A. Agda, A. J. Hellinga, C. S. B.  
1155 Lugo, T. A. Elliott, D. Ware, T. Peterson, N. Jiang, C. N. Hirsch, and M. B.  
1156 Hufford. Benchmarking transposable element annotation methods for creation  
1157 of a streamlined, comprehensive pipeline. *GENOME BIOLOGY*, 20(1), DEC  
1158 16 2019. ISSN 1474-760X. doi: 10.1186/s13059-019-1905-y.
- 1159 [54] R. Pisupati, V. Nizhynska, A. Mollá Morales, and M. Nordborg. On the causes  
1160 of gene-body methylation variation in arabidopsis thaliana. *PLoS genetics*, 19  
1161 (5):e1010728, 2023.

- 1162 [55] W. Rodriguez, O. Mazet, S. Grusea, A. Arredondo, J. M. Corujo, S. Boitard,  
1163 and L. Chikhi. The IICR and the non-stationary structured coalescent:  
1164 towards demographic inference with arbitrary changes in population struc-  
1165 ture. *Heredity*, 121(6):663–678, DEC 2018. ISSN 0018-067X. doi: {10.1038/  
1166 s41437-018-0148-0}.
- 1167 [56] P. A. Salome, K. Bombliès, J. Fitz, R. A. E. Laitinen, N. Warthmann, L. Yant,  
1168 and D. Weigel. The recombination landscape in *Arabidopsis thaliana* F-2  
1169 populations. *Heredity*, 108(4):447–455, APR 2012. ISSN 0018-067X. doi:  
1170 {10.1038/hdy.2011.95}.
- 1171 [57] A. Sand, M. Kristiansen, C. N. S. Pedersen, and T. Mailund. zipHMMlib:  
1172 a highly optimised HMM library exploiting repetitions in the input to speed  
1173 up the forward algorithm. *BMC Bioinformatics*, 14, NOV 22 2013. ISSN  
1174 1471-2105. doi: {10.1186/1471-2105-14-339}.
- 1175 [58] S. Schiffels and R. Durbin. Inferring human population size and separation his-  
1176 tory from multiple genome sequences. *Nature Genetics*, 46(8):919–925, AUG  
1177 2014. ISSN 1061-4036. doi: {10.1038/ng.3015}.
- 1178 [59] M. W. Schmid, C. Heichinger, D. Coman Schmid, D. Guthörl, V. Gagliardini,  
1179 R. Bruggmann, S. Aluri, C. Aquino, B. Schmid, L. A. Turnbull, et al. Contri-  
1180 bution of epigenetic variation to adaptation in *arabidopsis*. *Nature Commu-  
1181 nications*, 9(1):1–12, 2018.
- 1182 [60] R. J. Schmitz, M. D. Schultz, M. A. Urich, J. R. Nery, M. Pelizzola, O. Libiger,  
1183 A. Alix, R. B. McCosh, H. Chen, N. J. Schork, et al. Patterns of population  
1184 epigenomic diversity. *Nature*, 495(7440):193–198, 2013.
- 1185 [61] J. G. Schraiber and J. M. Akey. Methods and models for unravelling human  
1186 evolutionary history. *Nature Reviews Genetics*, 16(12):727–740, DEC 2015.  
1187 ISSN 1471-0056. doi: {10.1038/nrg4005}.
- 1188 [62] R. Schweiger and R. Durbin. Ultra-fast genome-wide inference of pairwise  
1189 coalescence times. *bioRxiv*, 2023.
- 1190 [63] T. P. P. Sellinger, D. Abu Awad, M. Moest, and A. Tellier. Inference of  
1191 past demography, dormancy and self-fertilization rates from whole genome  
1192 sequence data. *PLOS Genetics*, 16(4), APR 2020. ISSN 1553-7404.  
1193 doi: {10.1371/journal.pgen.1008698;10.1371/journal.pgen.1008698.r001;  
1194 10.1371/journal.pgen.1008698.r002;10.1371/journal.pgen.1008698.r003;10.  
1195 1371/journal.pgen.1008698.r004;10.1371/journal.pgen.1008698.r005;10.1371/  
1196 journal.pgen.1008698.r006}.

- 1197 [64] T. P. P. Sellinger, D. Abu-Awad, and A. Tellier. Limits and convergence  
1198 properties of the sequentially markovian coalescent. *MOLECULAR ECOL-  
1199 OGY RESOURCES*, 21(7):2231–2248, OCT 2021. ISSN 1755-098X. doi:  
1200 {10.1111/1755-0998.13416}.
- 1201 [65] Y. Shahryary, A. Symeonidi, R. R. Hazarika, J. Denkena, T. Mubeen,  
1202 B. Hofmeister, T. van Gulp, M. Colome-Tatch, K. J. F. Verhoeven, G. Tuskan,  
1203 R. J. Schmitz, and F. Johannes. Alphabeta: computational inference of  
1204 epimutation rates and spectra from high-throughput dna methylation data  
1205 in plants. *GENOME BIOLOGY*, 21(1), OCT 6 2020. ISSN 1474-760X. doi:  
1206 10.1186/s13059-020-02161-6.
- 1207 [66] L. Speidel, M. Forest, S. Shi, and S. R. Myers. A method for genome-wide  
1208 genealogy estimation for thousands of samples. *Nature Genetics*, 51(9):1321+,  
1209 SEP 2019. ISSN 1061-4036. doi: {10.1038/s41588-019-0484-x}.
- 1210 [67] T. Srikant and H.-G. Drost. How stress facilitates phenotypic innovation  
1211 through epigenetic diversity. *Frontiers in Plant Science*, 11:606800, 2021.
- 1212 [68] S. Strütt, T. Sellinger, S. Glémin, A. Tellier, and S. Laurent. Joint inference  
1213 of evolutionary transitions to self-fertilization and demographic history using  
1214 whole-genome sequences. *Elife*, 12:e82384, 2023.
- 1215 [69] A. Taudt, D. Roquis, A. Vidalis, R. Wardenaar, F. Johannes, and M. Colome-  
1216 Tatche. Methimpute: imputation-guided construction of complete methylomes  
1217 from wgbs data. *BMC GENOMICS*, 19, JUN 7 2018. ISSN 1471-2164. doi:  
1218 10.1186/s12864-018-4641-x.
- 1219 [70] A. Tellier, S. J. Y. Laurent, H. Lainer, P. Pavlidis, and W. Stephan. Infer-  
1220 ence of seed bank parameters in two wild tomato species using ecological and  
1221 genetic data. *Proceedings of the National Academy of Sciences of the United  
1222 States of America*, 108(41):17052–17057, OCT 11 2011. ISSN 0027-8424. doi:  
1223 {10.1073/pnas.1111266108}.
- 1224 [71] J. Terhorst, J. A. Kamm, and Y. S. Song. Robust and scalable inference  
1225 of population history froth hundreds of unphased whole genomes. *Nature  
1226 Genetics*, 49(2):303–309, FEB 2017. ISSN 1061-4036. doi: {10.1038/ng.3748}.
- 1227 [72] G. Upadhyya and M. Steinrücken. Robust Inference of Population Size Histories  
1228 from Genomic Sequencing Data. May 2021. doi: 10.1101/2021.05.22.445274.  
1229 URL <http://biorxiv.org/lookup/doi/10.1101/2021.05.22.445274>.
- 1230 [73] van der Graaf et al. Rate, spectrum, and evolutionary dynamics of sponta-  
1231 neous epimutations. *Proceedings of the National Academy of Sciences of the  
1232 United States of America*, 112(21):6676–6681, MAY 26 2015. ISSN 0027-8424.  
1233 doi: {10.1073/pnas.1424254112}.

- 1234 [74] A. Vidalis, D. Zivkovic, R. Wardenaar, D. Roquis, A. Tellier, and F. Johannes.  
1235 Methylome evolution in plants. *Genome Biology*, 17, DEC 20 2016. ISSN  
1236 1474-760X. doi: {10.1186/s13059-016-1127-5}.
- 1237 [75] J. Wakeley. Coalescent theory: an introduction. roberts and company. *Green-*  
1238 *wood Village Wayne AF, Maxwell MA, Ward CG, Vellios CV, Wilson I, Wayne*  
1239 *JC, Williams MR (2015) Sudden and rapid decline of the abundant marsupial*  
1240 *Bettongia penicillata in Australia. Oryx*, 49:175185Webb, 2008.
- 1241 [76] C. Wang and C. Liang. Msipred: a python package for tumor microsatellite  
1242 instability classification from tumor mutation annotation data using a support  
1243 vector machine. *SCIENTIFIC REPORTS*, 8, DEC 3 2018. ISSN 2045-2322.  
1244 doi: 10.1038/s41598-018-35682-z.
- 1245 [77] J. Wang and C. Fan. A neutrality test for detecting selection on dna methyla-  
1246 tion using single methylation polymorphism frequency spectrum. *GENOME*  
1247 *BIOLOGY AND EVOLUTION*, 7(1):154–171, JAN 2015. ISSN 1759-6653.  
1248 doi: 10.1093/gbe/evu271.
- 1249 [78] D. Weigel and V. Colot. Epialleles in plant evolution. *Genome biology*, 13  
1250 (10):1–6, 2012.
- 1251 [79] C. Wiuf and J. Hein. Recombination as a point process along sequences.  
1252 *Theoretical Population Biology*, 55(3):248–259, JUN 1999. ISSN 0040-5809.  
1253 doi: {10.1006/tpbi.1998.1403}.
- 1254 [80] A. W. Wohns, Y. Wong, B. Jeffery, A. Akbari, S. Mallick, R. Pinhasi, N. Pat-  
1255 terson, D. Reich, J. Kelleher, and G. McVean. A unified genealogy of modern  
1256 and ancient genomes. *SCIENCE*, 375(6583):836+, FEB 25 2022. ISSN 0036-  
1257 8075. doi: 10.1126/science.abi8264.
- 1258 [81] R. Yang, J. L. Van Etten, and S. M. Dehm. Indel detection from dna and rna  
1259 sequencing data with transindel. *BMC GENOMICS*, 19, APR 19 2018. ISSN  
1260 1471-2164. doi: 10.1186/s12864-018-4671-4.
- 1261 [82] Z. Yang. Statistical properties of a DNA sample under the finite-sites model.  
1262 *Genetics*, 144(4):1941–1950, DEC 1996. ISSN 0016-6731.
- 1263 [83] N. Yao, R. J. Schmitz, and F. Johannes. Epimutations define a fast-ticking  
1264 molecular clock in plants. *Trends in Genetics*, 37(8):699–710, 2021.
- 1265 [84] N. Yao, Z. Zhang, L. Yu, R. Hazarika, C. Yu, H. Jang, L. M. Smith, J. Ton,  
1266 L. Liu, J. J. Stachowicz, T. B. H. Reusch, R. J. Schmitz, and F. Johannes. An  
1267 evolutionary epigenetic clock in plants. *Science*, 381(6665):1440–1445, 2023.

- 1268 [85] X. Zhang, J. Yazaki, A. Sundaresan, S. Cokus, S. W.-L. Chan, H. Chen, I. R.  
1269 Henderson, P. Shinn, M. Pellegrini, S. E. Jacobsen, et al. Genome-wide high-  
1270 resolution mapping and functional analysis of dna methylation in arabidopsis.  
1271 *Cell*, 126(6):1189–1201, 2006.
- 1272 [86] Y. Zhang, S. Wang, and X. Wang. Data-driven-based approach to identifying  
1273 differentially methylated regions using modified 1d ising model. *BIOMED*  
1274 *RESEARCH INTERNATIONAL*, 2018, 2018. ISSN 2314-6133. doi: 10.1155/  
1275 2018/1070645.
- 1276 [87] D. Zilberman, M. Gehring, R. K. Tran, T. Ballinger, and S. Henikoff. Genome-  
1277 wide analysis of Arabidopsis thaliana DNA methylation uncovers an interde-  
1278 pendence between methylation and transcription. *Nature Genetics*, 39(1):  
1279 61–69, JAN 2007. ISSN 1061-4036. doi: {10.1038/ng1929}.
